# Supplementary material for: Forging the tricyclic core framework of euphordraculoate B via a Barbier-type allyl addition
Source: Royal Society of Chemistry journal article supplement (doi:10.1039/d4ob01743a), 2024-11-27
Supplement: d4ob01743a1.pdf [file d4ob01743a1.pdf]

## Supporting Information

### Forging the tricyclic core framework of euphordraculoate B via a Barbier-type allyl addition

Lingduan Meng, Jingjing Liu, Zeying Sun, Yangdong Hou\*, Qingyun Huang\*,  
Pingping Tang\*

*State Key Laboratory and Institute of Elemento-Organic Chemistry*

*College of Chemistry, Nankai University, Tianjin 300071, China*

| Contents:                                | Pages |
|------------------------------------------|-------|
| 1. General method                        | S2    |
| 2. Experimental procedures               | S2    |
| 3. Reaction Exploration and Optimization | S7    |
| 4. X-Ray data                            | S8    |
| 5. NMR Spectrum                          | S22   |
| 6. Reference                             | S31   |

## 1. General method

All reactions were carried out under a nitrogen atmosphere with dry solvents under anhydrous conditions, unless otherwise noted. Tetrahydrofuran (THF) and toluene were distilled immediately before use from sodium-benzophenone ketyl. Methylene chloride ( $\text{CH}_2\text{Cl}_2$ ) and triethylamine ( $\text{Et}_3\text{N}$ ) were distilled from calcium hydride and stored under an argon atmosphere. Reagents were purchased at the highest commercial quality and used without further purification, unless otherwise stated. Solvents for chromatography were used as supplied by Tianjin Reagents Chemical. Reactions were monitored by thin layer chromatography (TLC) carried out on silica gel Huanghai HSGF254 plates using UV light as visualizing agent and aqueous phosphomolybdic acid or basic aqueous potassium permanganate as developing agent. 200–300 mesh silica gel purchased from Qingdao Haiyang Chemical Co., China was used for flash column chromatography. NMR spectra were recorded on Bruker AVANCE AV 400, 600, 800 ( $^1\text{H}$ : 400 MHz,  $^{13}\text{C}$ : 101 MHz,  $^1\text{H}$ : 600 MHz,  $^{13}\text{C}$ : 151 MHz,  $^1\text{H}$ : 800 MHz,  $^{13}\text{C}$ : 201 MHz) instrument and calibrated by using residual undeuterated chloroform ( $\delta\text{H} = 7.26$  ppm) and  $\text{CDCl}_3$  ( $\delta\text{C} = 77.16$  ppm) as internal references. The following abbreviations are used to designate multiplicities: s = singlet, d = doublet, t = triplet, q = quartet, m = multiplet, quint = quintet. High-resolution mass spectra (HRMS) were obtained on Varian 7.0T FTMS. X-ray diffraction was realized on a Rigaku 007 Saturn 70 instrument.

## 2. Experimental Procedures

Compound **10**, **11** and **12** were synthesized based on a literature procedure <sup>[1][2]</sup>.

### Synthesis of **14**

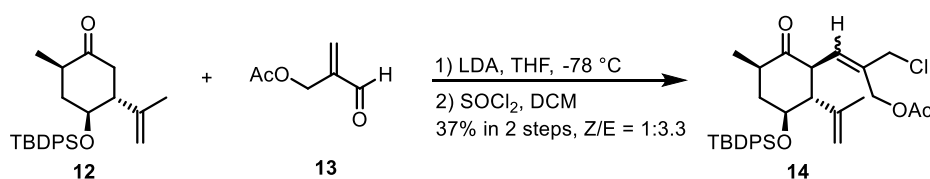

To a solution of ketone **12** (6.27 g, 15.4 mmol, 1.0 equiv) in THF (250 mL), LDA (2.0 M THF solution, 9.3 mL, 18.5 mmol, 1.2 equiv) was added at  $-78^\circ\text{C}$ . After stirring at  $-78^\circ\text{C}$  for 15 minutes, a solution of **13** (4 g, 30.8 mmol, 2.0 equiv) in 50 mL THF was slowly added to the mixture under nitrogen. The reaction mixture was stirred at  $-78^\circ\text{C}$  for 2 hours, and then saturated ammonium chloride solution was added to the mixture. The resultant mixture was raised to room temperature and stirred for additional 30 minutes. The reaction mixture was extracted with EA for three times. The combined organic layers were dried over anhydrous  $\text{Na}_2\text{SO}_4$ , filtered, and concentrated to afford the crude product, which was used in the next reaction without further purification.

2, 6-Lutidine (16.1 mL, 138.6 mmol, 9.0 equiv) was added to the solution of crude product in DCM (300 mL) at  $0^\circ\text{C}$ . After the reaction mixture was stirred at  $0^\circ\text{C}$  for 5 minutes,  $\text{SOCl}_2$  (10 mL, 138.6 mmol, 9.0 equiv) was slowly added to the mixture. The resultant mixture was raised to room temperature and stirred for 30 minutes, and then the mixture was cooled to  $0^\circ\text{C}$  again. Saturated  $\text{NaHCO}_3$  solution was added dropwise until foaming stopped, extracted with DCM for three times. The combined organic layers were dried over anhydrous  $\text{Na}_2\text{SO}_4$ , filtered, and concentrated. The crude residue was purified by column chromatography (petroleum ether/ethyl acetate = 10/1) to obtain the product **14** 3.1 g in 37% yield over 2 steps, colorless oil, Z:E = 1:3.3.

$[\alpha]_{\text{D}}^{20} = +10.1$  ( $c = 2.5$ ,  $\text{CH}_2\text{Cl}_2$ ).

(*E*)-**14**:  $R_f$  = 0.51 (petroleum ether/ethyl acetate = 5/1);  $^1\text{H}$  NMR (800 MHz, Chloroform-*d*)  $\delta$  7.72 – 7.69 (m, 2H), 7.66 – 7.63 (m, 2H), 7.49 – 7.43 (m, 2H), 7.42 – 7.37 (m, 4H), 5.58 (d,  $J$  = 9.4 Hz, 1H), 4.88 (s, 1H), 4.82 (s, 1H), 4.55 (d,  $J$  = 12.5 Hz, 1H), 4.41 (d,  $J$  = 12.5 Hz, 1H), 4.16 (d,  $J$  = 11.3 Hz, 1H), 4.10 (d,  $J$  = 11.3 Hz, 1H), 4.05 – 4.01 (m, 1H), 3.23 (dd,  $J$  = 12.4, 9.4 Hz, 1H), 2.47 (dd,  $J$  = 12.4, 9.8 Hz, 1H), 2.28 – 2.22 (m, 1H), 1.97 (s, 4H), 1.49 (s, 3H), 1.32 – 1.28 (m, 1H), 1.00 (s, 9H), 0.84 (d,  $J$  = 6.4 Hz, 3H).  $^{13}\text{C}$  NMR (201 MHz,  $\text{CDCl}_3$ )  $\delta$  209.1, 170.7, 142.3, 136.0, 135.9, 134.5, 133.4, 133.1, 131.8, 129.9, 129.6, 127.6, 127.4, 115.4, 71.2, 60.0, 59.3, 49.6, 47.3, 43.9, 41.9, 26.8, 20.8, 19.2, 14.1.

### Synthesis of 16

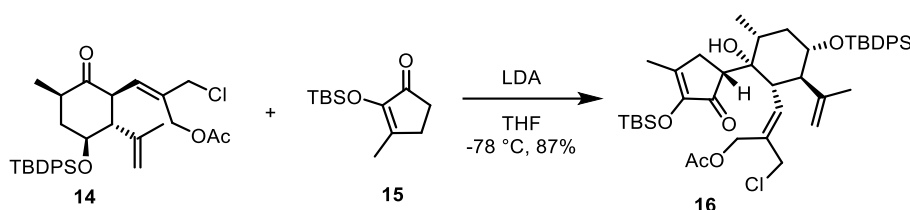

LDA (2.0 M THF solution, 2.5 mL, 5.04 mmol, 3.2 equiv) was added to a solution of ketone **15** (1.06 g, 4.72 mmol, 3.0 equiv) in THF (25 mL) at  $-78\text{ }^\circ\text{C}$ . After the reaction mixture was stirred at  $-78\text{ }^\circ\text{C}$  for 15 minutes, a solution of **14** (870 mg, 1.57 mmol, 1.0 equiv) in 10 mL THF was slowly added to the mixture under nitrogen. The reaction mixture was stirred at  $-78\text{ }^\circ\text{C}$  for 2 hours, and then saturated ammonium chloride solution was added to the mixture. The resultant mixture was raised to room temperature and stirred for additional 30 minutes. The reaction mixture was extracted with EA for three times. The combined organic layers were dried over anhydrous  $\text{Na}_2\text{SO}_4$ , filtered, and concentrated. The crude residue was purified by column chromatography (petroleum ether/ethyl acetate = 20/1) to obtain the product **16** 1.0 g in 87% yield, colorless oil, d.r. = 9:1.

$[\alpha]_D^{20} = +124.2$  ( $c = 0.3$ ,  $\text{CH}_2\text{Cl}_2$ ).

$R_f$  = 0.73 (petroleum ether/ethyl acetate = 5/1);  $^1\text{H}$  NMR (600 MHz, Chloroform-*d*)  $\delta$  7.66 (m, 4H), 7.45 – 7.32 (m, 6H), 5.96 (s, 1H), 5.28 (s, 1H), 4.78 (s, 1H), 4.60 – 4.52 (m, 2H), 4.10 (s, 2H), 3.49 (m, 1H), 2.50 (s, 1H), 2.21 – 2.17 (m, 1H), 2.08 (m, 1H), 2.04 (s, 3H), 1.99 (t,  $J$  = 11.4 Hz, 1H), 1.89 (s, 3H), 1.80 (q,  $J$  = 11.9 Hz, 1H), 1.37 – 1.21 (m, 3H), 1.25 (s, 3H), 0.97 (s, 9H), 0.92 (s, 9H), 0.48 (d,  $J$  = 6.7 Hz, 3H), 0.15 (s, 3H), 0.10 (s, 3H).  $^{13}\text{C}$  NMR (151 MHz,  $\text{CDCl}_3$ )  $\delta$  206.9, 170.7, 150.9, 148.2, 136.0, 135.1, 129.5, 129.3, 127.4, 127.2, 77.2, 59.6, 47.8, 47.4, 39.2, 36.1, 29.7, 29.6, 29.4, 26.8, 25.6, 20.8, 19.3, 18.2, 17.6, 14.7. HRMS-ESI ( $m/z$ ): Calcd. for  $\text{C}_{44}\text{H}_{63}\text{ClNaO}_6\text{Si}_2$   $[\text{M} + \text{Na}]^+$ : 801.3749. Found, 801.3751.

### Synthesis of 19

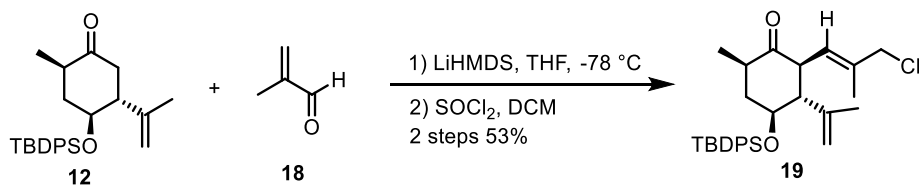

LiHMDS (1.0 M THF solution, 16.0 mL, 16.01 mmol, 1.3 equiv) was added to a solution of ketone **12** (5 g, 12.3 mmol, 1.0 equiv) in THF (100 mL) at  $-78\text{ }^\circ\text{C}$ . After the reaction mixture was stirred at  $-78\text{ }^\circ\text{C}$  for 15 minutes, a solution of **18** (5.0 mL, 61.5 mmol, 5.0 equiv) in 20 mL THF

solution was slowly added to the mixture under nitrogen. The reaction mixture was stirred at  $-78\text{ }^{\circ}\text{C}$  for 2 hours, and then saturated ammonium chloride solution was added to the mixture. The resultant mixture was raised to room temperature and stirred for additional 30 minutes. The reaction mixture was extracted with EA for three times. The combined organic layers were dried over anhydrous  $\text{Na}_2\text{SO}_4$ , filtered, and concentrated to afford the crude product, which was used in the next reaction without further purification.

2, 6-Lutidine (12.8 mL, 110.9 mmol, 9.0 equiv) was added to a solution of aldol crude product in DCM (250 mL) at  $0\text{ }^{\circ}\text{C}$ . After the reaction mixture was stirred at  $0\text{ }^{\circ}\text{C}$  for 5 minutes,  $\text{SOCl}_2$  (8.0 mL, 110.9 mmol, 9.0 equiv) was slowly added to the mixture. The resultant mixture was raised to room temperature and stirred for 30 minutes, and then the mixture was cooled to  $0\text{ }^{\circ}\text{C}$  again. Saturated  $\text{NaHCO}_3$  solution was added dropwise until foaming stopped, extracted with DCM for three times. The combined organic layers were dried over anhydrous  $\text{Na}_2\text{SO}_4$ , filtered, and concentrated. The crude residue was purified by column chromatography (petroleum ether/ethyl acetate = 10/1) to obtain the product **19** 3.1 g in 53% yield over 2 steps, colorless oil, only E.

$$[\alpha]_{\text{D}}^{20} = +110.5 (c = 0.2, \text{CH}_2\text{Cl}_2).$$

$R_f = 0.55$  (petroleum ether/ethyl acetate = 3/1);  $^1\text{H NMR}$  (400 MHz, Chloroform-*d*)  $\delta$  7.66 – 7.56 (m, 4H), 7.35 (m, 6H), 5.25 (d,  $J = 9.3$  Hz, 1H), 4.80 (s, 1H), 4.74 (s, 1H), 3.99 – 3.91 (m, 3H), 2.97 (dd,  $J = 12.4, 9.3$  Hz, 1H), 2.39 (dd,  $J = 12.3, 9.9$  Hz, 1H), 2.15 (dt,  $J = 13.1, 6.1$  Hz, 1H), 1.90 (dt,  $J = 12.8, 4.8$  Hz, 1H), 1.60 – 1.52 (m, 1H), 1.48 (s, 3H), 1.43 (s, 3H), 0.93 (s, 9H), 0.77 (d,  $J = 6.6$  Hz, 3H).  $^{13}\text{C NMR}$  (101 MHz,  $\text{CDCl}_3$ )  $\delta$  209.7, 142.4, 136.0, 135.9, 134.6, 134.2, 133.2, 129.8, 129.6, 127.6, 127.4, 126.4, 115.2, 71.3, 60.1, 51.8, 49.8, 43.4, 42.0, 26.8, 19.3, 19.1, 14.6, 14.2. HRMS-ESI ( $m/z$ ): Calcd. for  $\text{C}_{30}\text{H}_{39}\text{ClNaO}_2\text{Si}$  [ $\text{M} + \text{Na}$ ] $^+$ : 517.2306. Found, 517.2305.

### Synthesis of **21**

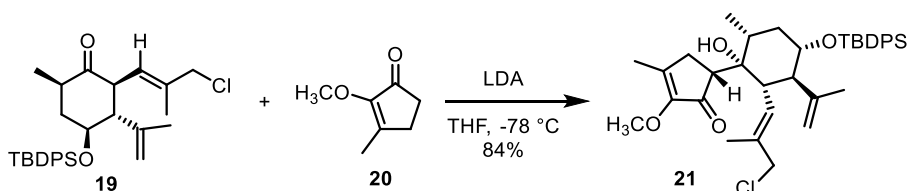

LDA (2.0 M THF solution, 3.2 mL, 6.47 mmol, 3.2 equiv) was added to a solution of enone **20** (760 mg, 6.07 mmol, 3.0 equiv) in THF (30 mL) at  $-78\text{ }^{\circ}\text{C}$ . After the reaction mixture was stirred at  $-78\text{ }^{\circ}\text{C}$  for 15 minutes, a solution of **19** (1 g, 2.02 mmol, 1.0 equiv) in 10 mL THF was slowly added to the mixture under nitrogen. The reaction mixture was stirred at  $-78\text{ }^{\circ}\text{C}$  for 2 hours, and then saturated ammonium chloride solution was added to the mixture. The resultant mixture was raised to room temperature and stirred for additional 30 minutes. The reaction mixture was extracted with EA for three times. The combined organic layers were dried over anhydrous  $\text{Na}_2\text{SO}_4$ , filtered, and concentrated. The crude residue was purified by column chromatography (petroleum ether/ethyl acetate = 10/1) to obtain the product **21** 1.05 g in 84% yield, colorless oil, d.r. = 8:1.

$$[\alpha]_{\text{D}}^{20} = +173.0 (c = 0.2, \text{CH}_2\text{Cl}_2).$$

$R_f = 0.35$  (petroleum ether/ethyl acetate = 10/1);  $^1\text{H NMR}$  (400 MHz, Chloroform-*d*)  $\delta$  7.72 – 7.64 (m, 4H), 7.45 – 7.31 (m, 6H), 5.64 (d,  $J = 10.6$  Hz, 1H), 5.22 (s, 1H), 4.76 (s, 1H), 4.68 (s, 1H), 4.01 (s, 2H), 3.81 (s, 3H), 3.51 (td,  $J = 10.7, 10.2, 3.9$  Hz, 1H), 2.68 – 2.62 (m, 1H), 2.54 (s, 1H), 2.30 – 2.06 (m, 2H), 1.95 (s, 3H), 1.81 (d,  $J = 11.8$  Hz, 1H), 1.64 (s, 3H), 1.49 (m, 2H), 1.45 – 1.32 (m, 1H), 0.97 (s, 9H), 0.52 (d,  $J = 6.7$  Hz, 3H).  $^{13}\text{C NMR}$  (101 MHz, Chloroform-*d*)  $\delta$  207.9, 153.9,

151.5, 136.1, 136.0, 135.2, 133.9, 129.4, 129.2, 127.3, 127.2, 77.7, 58.3, 52.5, 48.5, 39.5, 36.2, 30.4, 26.8, 19.3, 17.6, 15.2, 14.8. HRMS-ESI (m/z): Calcd. for  $C_{37}H_{49}ClNaO_4Si$   $[M + Na]^+$ : 643.2986. Found, 643.2985.

### Synthesis of 22

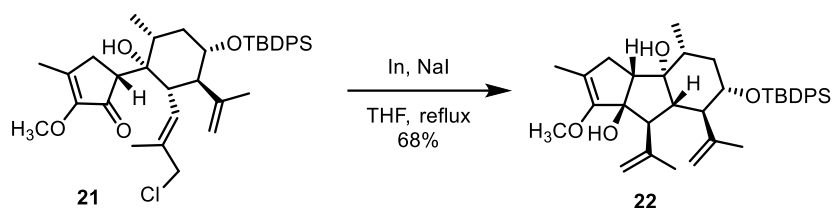

In powder (376 mg, 3.22 mmol, 20.0 equiv) and NaI (120 mg, 0.81 mmol, 5.0 equiv) were added to a solution of **21** (100 mg, 0.16 mmol, 1.0 equiv) in THF (3.2 mL) under nitrogen. The reaction mixture was stirred at 90 °C for 30 minutes, and then cooled to room temperature. 10 mL  $Et_2O$  was added into the mixture, and filtered through a pad of Celite with  $Et_2O$  washing (5 mL\*3). The filtrate was washed by saturated  $Na_2S_2O_3$  solution, and dried over anhydrous  $Na_2SO_4$ , filtered, and concentrated. The crude residue was purified by column chromatography (petroleum ether/ethyl acetate = 10/1) to obtain the product **22** 63mg in 68% yield, white solid, d.r.>20:1.

Note: The product **22** is sensitive to acid. During the column chromatography process, the silica gel should be alkalinized with petroleum ether containing 1%  $Et_3N$ .

$$[\alpha]_D^{20} = +87.9 (c = 0.5, CH_2Cl_2).$$

$R_f = 0.35$  (petroleum ether/ethyl acetate = 5/1);  $^1H$  NMR (600 MHz, Chloroform-*d*)  $\delta$  7.69 (d,  $J = 7.3$  Hz, 1H), 7.65 (d,  $J = 7.3$  Hz, 1H), 7.43 – 7.30 (m, 6H), 5.11 (s, 1H), 4.87 (s, 1H), 4.66 (s, 1H), 4.63 (s, 1H), 3.74 (s, 3H), 3.57 (td,  $J = 10.9, 10.4, 4.7$  Hz, 1H), 2.87 (s, 1H), 2.63 (t,  $J = 10.5$  Hz, 1H), 2.45 (m, 2H), 2.10 (d,  $J = 16.2$  Hz, 1H), 2.02 (d,  $J = 8.2$  Hz, 1H), 1.83 (s, 3H), 1.73 (s, 3H), 1.68 (t,  $J = 12.2$  Hz, 1H), 1.57 (m, 2H), 1.45 – 1.38 (m, 1H), 1.26 (s, 3H), 0.98 (s, 9H), 0.75 (d,  $J = 6.7$  Hz, 3H).  $^{13}C$  NMR (151 MHz,  $CDCl_3$ )  $\delta$  155.1, 144.7, 136.0, 135.9, 135.3, 134.2, 129.4, 129.2, 127.3, 127.1, 115.5, 114.9, 113.6, 88.3, 78.9, 72.9, 60.1, 54.9, 53.5, 39.3, 39.0, 32.0, 26.9, 19.3, 15.6, 13.1. HRMS-ESI (m/z): Calcd. for  $C_{37}H_{50}NaO_4Si$   $[M + Na]^+$ : 609.3376. Found, 609.3375. Mp: 104-106°C.

### Synthesis of 23

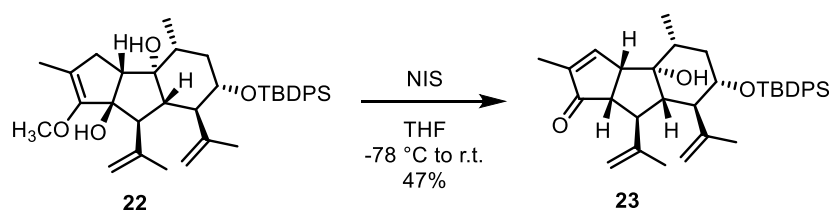

NIS (6.9 mg, 0.03 mmol, 1.0 equiv) was added to a solution of **22** (18 mg, 0.03 mmol, 1.0 equiv) in THF (1.5 mL) at -78 °C under nitrogen. After the reaction mixture was stirred at -78 °C for 1 hour, the resultant mixture was slowly raised to room temperature and stirred for 30 minutes. Saturated  $Na_2S_2O_3$  solution was added to the mixture to quench the reaction. The reaction mixture was extracted with EA for three times. The combined organic layers were dried over anhydrous  $Na_2SO_4$ , filtered, and concentrated. The crude residue was purified by column chromatography (petroleum ether/ethyl acetate = 10/1) to obtain the product **23** 7.8 mg in 47% yield, white solid.

Note: The product **23** is sensitive to acid. During the column chromatography process, the silica gel should be alkalized with petroleum ether containing 1% Et<sub>3</sub>N.

$[\alpha]_D^{20} = +102.2$  ( $c = 0.15$ , CH<sub>2</sub>Cl<sub>2</sub>).

$R_f = 0.45$  (petroleum ether/ethyl acetate = 5/1); <sup>1</sup>H NMR (600 MHz, Chloroform-*d*)  $\delta$  7.69 (d,  $J = 7.3$  Hz, 1H), 7.66 (d,  $J = 7.3$  Hz, 1H), 7.38 (m, 6H), 6.97 (s, 1H), 4.82 (s, 1H), 4.75 (s, 1H), 4.73 (s, 1H), 4.72 (s, 1H), 3.55 (td,  $J = 10.5, 4.5$  Hz, 1H), 2.93 (s, 1H), 2.56 (m, 2H), 2.44 (t,  $J = 10.7$  Hz, 1H), 1.78 (s, 3H), 1.71 (s, 3H), 1.67 (t,  $J = 11.4$  Hz, 1H), 1.55 (m, 5H), 1.40 (m, 2H), 0.97 (s, 9H), 0.80 (d,  $J = 6.5$  Hz, 3H). <sup>13</sup>C NMR (151 MHz, CDCl<sub>3</sub>)  $\delta$  209.8, 151.5, 144.7, 136.0, 136.0, 135.3, 133.8, 129.5, 129.2, 127.3, 127.2, 78.9, 53.1, 39.4, 38.1, 26.8, 19.4, 15.8, 10.6.

### Synthesis of **24**

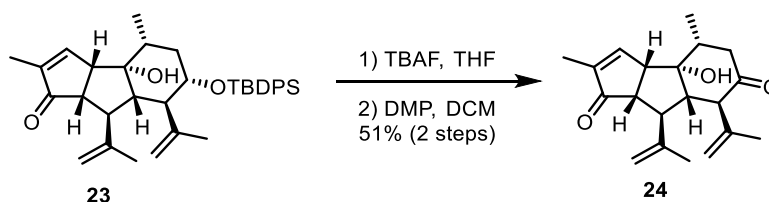

TBAF (1.0 M THF, 0.1 mL, 0.1 mmol, 5.0 equiv) was added to a solution of **23** (12 mg, 0.02 mmol, 1.0 equiv) in THF (0.4 mL) at room temperature. After the reaction mixture was stirred for 4 hours, water (3 mL) was added. The reaction mixture was extracted with EA for three times. The combined organic layers were dried over anhydrous Na<sub>2</sub>SO<sub>4</sub>, filtered, and concentrated to afford the crude product, which was used in the next reaction without further purification.

DMP (42.4 mg, 0.1 mmol, 5.0 equiv) was added to a solution of the crude product in DCM (1 mL) at room temperature. The mixture was stirred for 4 hours. Then the mixture was filtered through a pad of Celite with DCM washing (5 mL\*3). The filtrate was washed with saturated NaHCO<sub>3</sub> solution. The combined organic layers were dried over anhydrous Na<sub>2</sub>SO<sub>4</sub>, filtered, and concentrated. The crude residue was purified by column chromatography (petroleum ether/ethyl acetate = 3/1) to obtain the product **24** 3.2 mg in 51% yield over 2 steps, white solid.

Note: The product **24** is sensitive to acid. During the column chromatography process, the silica gel should be alkalized with petroleum ether containing 1% Et<sub>3</sub>N.

$[\alpha]_D^{20} = +115.6$  ( $c = 0.15$ , CH<sub>2</sub>Cl<sub>2</sub>).

$R_f = 0.65$  (petroleum ether/ethyl acetate = 1/1); <sup>1</sup>H NMR (600 MHz, Chloroform-*d*)  $\delta$  7.09 (s, 1H), 4.87 (s, 2H), 4.84 (s, 1H), 4.74 (s, 1H), 3.31 (d,  $J = 12.2$  Hz, 1H), 3.25 (d,  $J = 7.4$  Hz, 1H), 2.78 (t,  $J = 7.2$  Hz, 1H), 2.66 (dd,  $J = 11.1, 7.3$  Hz, 1H), 2.41 (m, 1H), 2.33 (m, 2H), 2.14 (dt,  $J = 12.6, 6.3$  Hz, 1H), 1.85 (s, 3H), 1.78 (s, 3H), 1.63 (s, 3H), 1.07 (d,  $J = 6.5$  Hz, 2H). <sup>13</sup>C NMR (151 MHz, CDCl<sub>3</sub>)  $\delta$  208.4, 208.0, 149.2, 145.0, 143.9, 139.5, 115.3, 112.5, 77.8, 58.1, 56.3, 54.9, 51.6, 48.8, 43.8, 37.8, 28.6, 19.6, 19.4, 15.0, 9.7. HRMS-ESI ( $m/z$ ): Calcd. for C<sub>20</sub>H<sub>26</sub>NaO<sub>3</sub> [M + Na]<sup>+</sup>: 337.1780. Found, 337.1788.

### 3. Reaction Exploration and Optimization

#### 3.1 Optimization of **14**

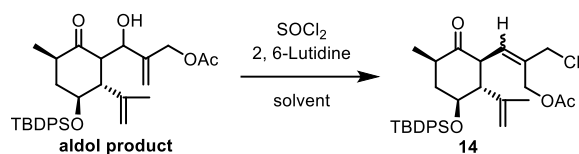

| Entry | Solvent                                   | Result           |
|-------|-------------------------------------------|------------------|
| 1     | Et <sub>2</sub> O/ <i>n</i> -Hexane = 3:2 | 61%, Z/E = 1:2.8 |
| 2     | Et <sub>2</sub> O                         | 65%, Z/E = 1:3.3 |
| 3     | DCM                                       | 72%, Z/E = 1:3.3 |
| 4     | Toluene                                   | 56%, Z/E = 1:2.6 |
| 5     | THF                                       | 33%, Z/E = 1:3.1 |
| 6     | Acetone                                   | 8%, Z/E = 1:4.0  |
| 7     | CH <sub>3</sub> CN                        | 6%, Z/E = 1:5.1  |

conditions: **aldol product** (1 equiv), SOCl<sub>2</sub> (9 equiv), 2, 6-Lutidine (9 equiv), solvents, c = 0.05 mol/L, 0 °C to r.t.

#### 3.2 Exploration of cyclization reactions

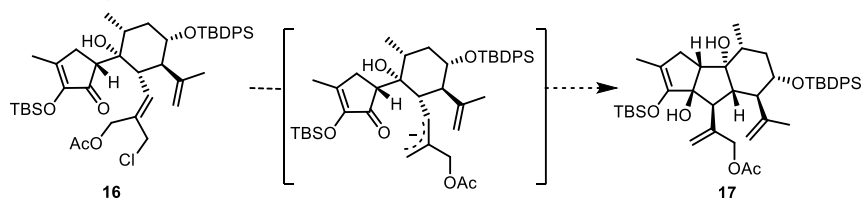

| Entry | Conditions                          | Result      |
|-------|-------------------------------------|-------------|
| 1     | Zn, NaI, reflux                     | n.d.        |
| 2     | SnCl <sub>2</sub> , NaI, DMF, 60 °C | n.r.        |
| 3     | CrCl <sub>2</sub> , Mn, 60 °C       | n.r.        |
| 4     | Sml <sub>2</sub> , r.t.             | retro-aldol |
| 5     | Sml <sub>2</sub> , 50 °C            | retro-aldol |
| 6     | Sml <sub>2</sub> , HMPA, r.t.       | retro-aldol |

#### 3.3 Optimization of **23**

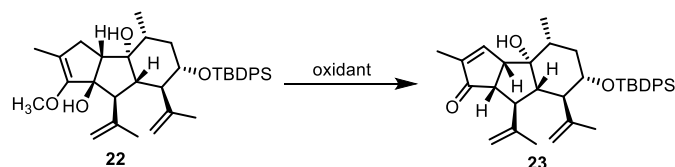

| Entry | Conditions                       | Result |
|-------|----------------------------------|--------|
| 1     | Br <sub>2</sub> , DCM, -30 °C    | trace  |
| 2     | Br <sub>2</sub> , DCM, -78 °C    | 5%     |
| 3     | NBS, THF, -78 °C                 | trace  |
| 4     | PyHBr <sub>3</sub> , DCM, -78 °C | n.d.   |
| 5     | NIS, THF, -78 °C to r.t.         | 47%    |
| 6     | NIS, DCM, -78 °C to r.t.         | 7%     |
| 7     | NIS, THF, -30 °C to r.t.         | trace  |
| 8     | NIS, THF, 0 °C to r.t.           | trace  |

conditions: **22** (1 equiv), oxidant (1.2 equiv), solvents, c = 0.02 mol/L

## 4. X-Ray data

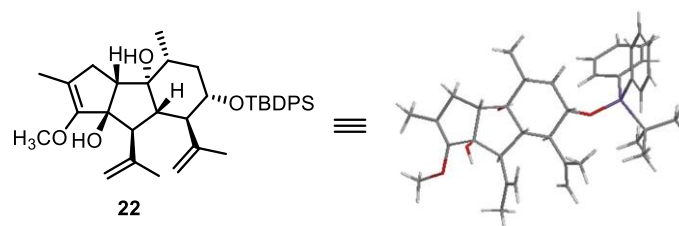**Table 1 Crystal data and structure refinement for 22 (CCDC 2354348).**

|                                    |                                                   |
|------------------------------------|---------------------------------------------------|
| Identification code                | 22                                                |
| Empirical formula                  | C <sub>37</sub> H <sub>50</sub> O <sub>4</sub> Si |
| Formula weight                     | 586.86                                            |
| Temperature/K                      | 113.15                                            |
| Crystal system                     | monoclinic                                        |
| Space group                        | P2 <sub>1</sub>                                   |
| a/Å                                | 10.62167(13)                                      |
| b/Å                                | 10.50225(11)                                      |
| c/Å                                | 15.14865(15)                                      |
| α/°                                | 90                                                |
| β/°                                | 93.6459(10)                                       |
| γ/°                                | 90                                                |
| Volume/Å <sup>3</sup>              | 1686.43(3)                                        |
| Z                                  | 2                                                 |
| ρ <sub>calc</sub> /cm <sup>3</sup> | 1.156                                             |
| μ/mm <sup>-1</sup>                 | 0.106                                             |
| F(000)                             | 636.0                                             |



|                                                  |                                                                        |
|--------------------------------------------------|------------------------------------------------------------------------|
| Crystal size/mm <sup>3</sup>                     | 0.28 × 0.26 × 0.14                                                     |
| Radiation                                        | MoK $\alpha$ ( $\lambda = 0.71073$ )                                   |
| 2 $\Theta$ range for data collection/ $^{\circ}$ | 3.842 to 59.15                                                         |
| Index ranges                                     | -14 $\leq$ h $\leq$ 14, -14 $\leq$ k $\leq$ 14, -21 $\leq$ l $\leq$ 20 |
| Reflections collected                            | 38186                                                                  |
| Independent reflections                          | 9443 [ $R_{\text{int}} = 0.0623$ , $R_{\text{sigma}} = 0.0438$ ]       |
| Data/restraints/parameters                       | 9443/3/395                                                             |
| Goodness-of-fit on $F^2$                         | 1.068                                                                  |
| Final R indexes [ $I \geq 2\sigma(I)$ ]          | $R_1 = 0.0447$ , $wR_2 = 0.1083$                                       |
| Final R indexes [all data]                       | $R_1 = 0.0464$ , $wR_2 = 0.1097$                                       |
| Largest diff. peak/hole / e $\text{\AA}^{-3}$    | 0.41/-0.25                                                             |
| Flack parameter                                  | 0.06(5)                                                                |

**Table 2 Fractional Atomic Coordinates ( $\times 10^4$ ) and Equivalent Isotropic Displacement Parameters ( $\text{\AA}^2 \times 10^3$ ) for 22.  $U_{\text{eq}}$  is defined as 1/3 of of the trace of the orthogonalised  $U_{\text{ij}}$  tensor.**

| Atom | $x$         | $y$         | $z$         | $U(\text{eq})$ |
|------|-------------|-------------|-------------|----------------|
| Si1  | -7538.3(5)  | -4477.2(5)  | -1508.8(3)  | 16.07(12)      |
| O1   | -6514.1(13) | -4501.7(15) | -2272.3(9)  | 20.2(3)        |
| O2   | -5729.2(14) | -4290.3(13) | -5096.6(9)  | 18.0(3)        |
| O3   | -2947.5(15) | -7225.5(14) | -5545.6(10) | 20.7(3)        |
| O4   | -2146.6(16) | -4691.9(16) | -6115.3(10) | 28.1(3)        |

|     |             |             |             |         |
|-----|-------------|-------------|-------------|---------|
| C1  | -6891.9(18) | -6111.1(19) | -4528.7(13) | 18.0(4) |
| C2  | -7249.8(18) | -5373(2)    | -3703.4(13) | 17.8(4) |
| C3  | -6219.6(18) | -5378.7(19) | -2950.4(12) | 16.0(3) |
| C4  | -4916.0(17) | -4983.1(18) | -3248.3(12) | 14.7(3) |
| C5  | -4609.6(17) | -5768.5(18) | -4065.2(12) | 14.3(3) |
| C6  | -3386.2(18) | -5434.8(19) | -4506.9(12) | 16.3(3) |
| C7  | -3622(2)    | -6043.8(18) | -5450.5(12) | 17.2(4) |
| C8  | -5049.7(19) | -6300.2(18) | -5593.1(12) | 17.7(4) |
| C9  | -5637.0(18) | -5596.2(17) | -4826.6(12) | 14.8(3) |
| C10 | -5418(2)    | -5821(2)    | -6535.0(13) | 24.1(4) |
| C11 | -4297(2)    | -5079(2)    | -6816.6(14) | 24.9(4) |
| C12 | -3345(2)    | -5175.0(19) | -6203.6(13) | 21.5(4) |
| C13 | -7972(2)    | -6070(2)    | -5248.7(15) | 27.9(5) |
| C14 | -3911.2(19) | -5070(2)    | -2491.4(13) | 19.3(4) |
| C15 | -3184(2)    | -4075(2)    | -2271.7(17) | 32.0(5) |
| C16 | -3763(2)    | -6304(2)    | -2000.3(14) | 27.4(5) |
| C17 | -2140(2)    | -5809(2)    | -4030.2(14) | 24.9(4) |
| C18 | -1914(3)    | -6971(3)    | -3716.2(16) | 34.4(5) |
| C19 | -1142(2)    | -4779(3)    | -3967.1(19) | 39.6(6) |
| C20 | -4433(3)    | -4441(3)    | -7706.0(15) | 39.3(6) |
| C21 | -1728(3)    | -3887(3)    | -6793.2(19) | 38.6(6) |
| C22 | -6663(2)    | -3769(2)    | -492.8(13)  | 21.7(4) |

|     |             |             |             |         |
|-----|-------------|-------------|-------------|---------|
| C23 | -6403(4)    | -2370(3)    | -688(2)     | 51.1(9) |
| C24 | -7447(3)    | -3865(3)    | 315.6(16)   | 41.7(7) |
| C25 | -5389(2)    | -4413(3)    | -276.0(16)  | 38.8(6) |
| C26 | -8857.8(19) | -3358.7(19) | -1853.1(13) | 19.5(4) |
| C27 | -8810(2)    | -2616(2)    | -2617.3(14) | 23.2(4) |
| C28 | -9733(2)    | -1711(2)    | -2838.3(17) | 29.3(5) |
| C29 | -10701(2)   | -1497(2)    | -2285.0(18) | 31.5(5) |
| C30 | -10760(2)   | -2199(2)    | -1517.9(17) | 29.4(5) |
| C31 | -9860(2)    | -3137(2)    | -1314.7(15) | 25.1(4) |
| C32 | -8195(2)    | -6110(2)    | -1311.3(13) | 19.9(4) |
| C33 | -9433(2)    | -6425(2)    | -1614.9(14) | 24.3(4) |
| C34 | -9931(2)    | -7630(2)    | -1479.7(15) | 28.8(5) |
| C35 | -9209(2)    | -8551(2)    | -1034.7(15) | 29.0(5) |
| C36 | -7986(2)    | -8272(2)    | -730.3(16)  | 29.2(5) |
| C37 | -7484(2)    | -7072(2)    | -870.8(15)  | 26.0(4) |

**Table 3 Anisotropic Displacement Parameters ( $\text{\AA}^2 \times 10^3$ ) for 22. The Anisotropic displacement factor exponent takes the form:  $-2\pi^2[h^2a^*U_{11}+2hka^*b^*U_{12}+\dots]$ .**

| Atom | $U_{11}$ | $U_{22}$ | $U_{33}$ | $U_{23}$  | $U_{13}$ | $U_{12}$ |
|------|----------|----------|----------|-----------|----------|----------|
| Si1  | 16.0(2)  | 20.5(3)  | 11.9(2)  | -1.66(19) | 2.54(16) | -1.6(2)  |
| O1   | 20.6(6)  | 24.9(7)  | 15.8(6)  | -4.2(6)   | 7.1(5)   | -3.1(6)  |
| O2   | 24.4(7)  | 13.0(6)  | 16.8(6)  | 1.0(5)    | 3.4(5)   | 2.4(5)   |

Supporting Information

---

|     |          |          |          |          |          |          |
|-----|----------|----------|----------|----------|----------|----------|
| O3  | 25.6(8)  | 14.7(6)  | 22.6(7)  | -1.2(5)  | 8.1(6)   | 3.5(6)   |
| O4  | 34.0(8)  | 27.5(8)  | 24.0(7)  | 5.0(6)   | 11.8(6)  | -7.5(7)  |
| C1  | 17.2(9)  | 19.4(9)  | 17.3(8)  | -2.8(7)  | 0.3(7)   | -3.1(7)  |
| C2  | 16.0(8)  | 20.8(9)  | 17.0(8)  | -1.0(7)  | 2.6(7)   | -1.8(7)  |
| C3  | 16.8(8)  | 17.7(8)  | 13.6(8)  | -0.3(7)  | 3.2(6)   | -1.5(7)  |
| C4  | 15.5(8)  | 15.7(8)  | 13.2(8)  | -0.6(6)  | 3.0(6)   | -0.9(7)  |
| C5  | 15.0(8)  | 13.9(8)  | 14.1(8)  | 0.4(6)   | 2.7(6)   | -0.3(6)  |
| C6  | 17.1(8)  | 17.0(8)  | 15.1(8)  | -2.0(7)  | 4.5(6)   | 0.3(7)   |
| C7  | 23.3(9)  | 14.2(8)  | 14.9(8)  | -0.9(6)  | 6.5(7)   | 1.3(7)   |
| C8  | 23.6(9)  | 14.2(8)  | 15.5(8)  | -2.2(7)  | 3.5(7)   | -0.7(7)  |
| C9  | 19.1(8)  | 12.1(8)  | 13.3(8)  | -0.6(6)  | 1.5(6)   | -0.6(7)  |
| C10 | 32.5(11) | 25.1(10) | 14.5(8)  | -3.1(7)  | -0.1(8)  | 0.3(9)   |
| C11 | 40.0(12) | 18.2(10) | 17.4(9)  | 0.4(7)   | 7.5(8)   | 3.9(9)   |
| C12 | 32.9(11) | 15.2(9)  | 17.5(9)  | -0.7(7)  | 10.5(8)  | -0.5(8)  |
| C13 | 22.0(10) | 38.6(13) | 22.6(10) | -7.0(9)  | -3.3(8)  | -6.4(9)  |
| C14 | 17.5(9)  | 26.0(10) | 14.6(8)  | -0.1(7)  | 2.2(7)   | 2.4(8)   |
| C15 | 27.6(11) | 32.9(12) | 34.1(12) | -2.3(10) | -10.1(9) | -3.0(9)  |
| C16 | 28.0(11) | 33.3(12) | 20.6(10) | 8.7(9)   | -1.4(8)  | 1.3(9)   |
| C17 | 19.0(9)  | 36.2(11) | 19.9(9)  | -5.2(8)  | 3.7(7)   | 3.4(8)   |
| C18 | 32.5(12) | 43.1(14) | 27.1(11) | -1.3(10) | -0.8(9)  | 16.8(11) |
| C19 | 21.0(10) | 59.2(18) | 38.5(13) | -3.6(12) | 1.6(9)   | -6.8(11) |
| C20 | 62.4(17) | 34.1(12) | 21.7(10) | 9.1(10)  | 3.7(10)  | 3.7(13)  |

---

|     |          |          |          |           |           |           |
|-----|----------|----------|----------|-----------|-----------|-----------|
| C21 | 45.8(15) | 30.8(13) | 41.6(14) | 13.9(11)  | 21.4(12)  | -3.3(11)  |
| C22 | 22.1(10) | 25.7(10) | 17.2(9)  | -4.8(7)   | -0.2(7)   | -3.2(8)   |
| C23 | 69(2)    | 32.5(14) | 48.0(16) | -1.0(12)  | -23.6(15) | -19.8(14) |
| C24 | 35.3(13) | 71(2)    | 19.8(10) | -17.2(12) | 6.1(9)    | -7.4(13)  |
| C25 | 27.7(11) | 58.5(17) | 28.6(11) | -15.7(13) | -9.3(9)   | 7.3(13)   |
| C26 | 18.6(9)  | 21.3(10) | 18.5(9)  | -2.1(7)   | 1.2(7)    | -2.4(7)   |
| C27 | 23.6(10) | 24.3(10) | 21.6(10) | -1.4(8)   | 1.7(8)    | -3.8(8)   |
| C28 | 31.6(12) | 24.1(10) | 31.5(11) | 4.9(9)    | -2.9(9)   | -0.5(9)   |
| C29 | 24.6(11) | 23.8(11) | 45.5(14) | -1.3(10)  | -3.8(10)  | 3.5(9)    |
| C30 | 21.0(10) | 31.1(11) | 36.7(12) | -6.9(10)  | 5.9(9)    | -0.9(9)   |
| C31 | 23.4(10) | 28.0(11) | 24.4(10) | -1.2(8)   | 5.6(8)    | -1.2(9)   |
| C32 | 22.4(9)  | 23.7(9)  | 14.0(8)  | -2.6(7)   | 5.7(7)    | -2.0(8)   |
| C33 | 23.0(10) | 30.4(11) | 19.5(9)  | 2.1(8)    | 2.4(8)    | -3.7(9)   |
| C34 | 27.2(11) | 36.1(12) | 23.3(10) | -2.1(9)   | 4.1(9)    | -11.2(10) |
| C35 | 38.3(13) | 26.1(10) | 23.9(10) | -2.7(9)   | 12.8(9)   | -9.2(9)   |
| C36 | 33.0(12) | 24.6(11) | 30.8(11) | 2.4(9)    | 8.2(9)    | 2.6(9)    |
| C37 | 22.1(10) | 27.6(10) | 28.5(11) | 0.4(9)    | 3.4(8)    | -1.3(9)   |

**Table 4 Bond Lengths for 22.**

| Atom | Atom | Length/Å   | Atom | Atom | Length/Å |
|------|------|------------|------|------|----------|
| Si1  | O1   | 1.6376(14) | C8   | C10  | 1.540(3) |
| Si1  | C22  | 1.898(2)   | C10  | C11  | 1.508(3) |

|     |     |          |     |     |          |
|-----|-----|----------|-----|-----|----------|
| Si1 | C26 | 1.877(2) | C11 | C12 | 1.333(3) |
| Si1 | C32 | 1.883(2) | C11 | C20 | 1.503(3) |
| O1  | C3  | 1.429(2) | C14 | C15 | 1.330(3) |
| O2  | C9  | 1.433(2) | C14 | C16 | 1.498(3) |
| O3  | C7  | 1.445(2) | C17 | C18 | 1.325(4) |
| O4  | C12 | 1.369(3) | C17 | C19 | 1.514(4) |
| O4  | C21 | 1.423(3) | C22 | C23 | 1.527(4) |
| C1  | C2  | 1.539(3) | C22 | C24 | 1.527(3) |
| C1  | C9  | 1.533(3) | C22 | C25 | 1.530(3) |
| C1  | C13 | 1.532(3) | C26 | C27 | 1.399(3) |
| C2  | C3  | 1.530(3) | C26 | C31 | 1.401(3) |
| C3  | C4  | 1.540(3) | C27 | C28 | 1.391(3) |
| C4  | C5  | 1.539(3) | C28 | C29 | 1.386(4) |
| C4  | C14 | 1.519(3) | C29 | C30 | 1.381(4) |
| C5  | C6  | 1.539(3) | C30 | C31 | 1.394(3) |
| C5  | C9  | 1.547(3) | C32 | C33 | 1.405(3) |
| C6  | C7  | 1.571(3) | C32 | C37 | 1.404(3) |
| C6  | C17 | 1.519(3) | C33 | C34 | 1.392(3) |
| C7  | C8  | 1.541(3) | C34 | C35 | 1.383(4) |
| C7  | C12 | 1.505(3) | C35 | C36 | 1.381(4) |
| C8  | C9  | 1.541(3) | C36 | C37 | 1.390(3) |

**Table 5 Bond Angles for 22.**

| Atom | Atom | Atom | Angle/°    | Atom | Atom | Atom | Angle/°    |
|------|------|------|------------|------|------|------|------------|
| O1   | Si1  | C22  | 105.42(8)  | C1   | C9   | C8   | 116.99(15) |
| O1   | Si1  | C26  | 109.36(9)  | C8   | C9   | C5   | 101.85(15) |
| O1   | Si1  | C32  | 111.57(9)  | C11  | C10  | C8   | 105.79(18) |
| C26  | Si1  | C22  | 107.36(9)  | C12  | C11  | C10  | 109.98(18) |
| C26  | Si1  | C32  | 109.66(9)  | C12  | C11  | C20  | 133.2(2)   |
| C32  | Si1  | C22  | 113.29(9)  | C20  | C11  | C10  | 116.8(2)   |
| C3   | O1   | Si1  | 134.70(13) | O4   | C12  | C7   | 112.11(18) |
| C12  | O4   | C21  | 118.7(2)   | C11  | C12  | O4   | 134.40(19) |
| C9   | C1   | C2   | 109.02(15) | C11  | C12  | C7   | 113.45(19) |
| C13  | C1   | C2   | 110.59(17) | C15  | C14  | C4   | 120.73(19) |
| C13  | C1   | C9   | 113.95(17) | C15  | C14  | C16  | 121.0(2)   |
| C3   | C2   | C1   | 113.70(16) | C16  | C14  | C4   | 118.27(18) |
| O1   | C3   | C2   | 110.77(16) | C18  | C17  | C6   | 122.8(2)   |
| O1   | C3   | C4   | 106.19(15) | C18  | C17  | C19  | 121.7(2)   |
| C2   | C3   | C4   | 113.22(15) | C19  | C17  | C6   | 115.5(2)   |
| C5   | C4   | C3   | 109.33(15) | C23  | C22  | Si1  | 107.77(16) |
| C14  | C4   | C3   | 111.36(15) | C23  | C22  | C25  | 107.3(2)   |
| C14  | C4   | C5   | 113.60(15) | C24  | C22  | Si1  | 111.14(15) |
| C4   | C5   | C6   | 117.06(15) | C24  | C22  | C23  | 109.5(2)   |
| C4   | C5   | C9   | 111.19(15) | C24  | C22  | C25  | 108.6(2)   |

|     |    |     |            |     |     |     |            |
|-----|----|-----|------------|-----|-----|-----|------------|
| C6  | C5 | C9  | 102.95(14) | C25 | C22 | Si1 | 112.42(15) |
| C5  | C6 | C7  | 102.26(15) | C27 | C26 | Si1 | 120.86(16) |
| C17 | C6 | C5  | 117.95(17) | C27 | C26 | C31 | 117.2(2)   |
| C17 | C6 | C7  | 114.27(16) | C31 | C26 | Si1 | 121.58(16) |
| O3  | C7 | C6  | 112.88(16) | C28 | C27 | C26 | 121.2(2)   |
| O3  | C7 | C8  | 109.00(15) | C29 | C28 | C27 | 120.2(2)   |
| O3  | C7 | C12 | 108.84(15) | C30 | C29 | C28 | 119.8(2)   |
| C8  | C7 | C6  | 107.30(15) | C29 | C30 | C31 | 119.7(2)   |
| C12 | C7 | C6  | 114.54(16) | C30 | C31 | C26 | 121.7(2)   |
| C12 | C7 | C8  | 103.76(17) | C33 | C32 | Si1 | 120.74(17) |
| C9  | C8 | C7  | 104.60(15) | C37 | C32 | Si1 | 122.49(16) |
| C10 | C8 | C7  | 105.24(16) | C37 | C32 | C33 | 116.8(2)   |
| C10 | C8 | C9  | 116.74(17) | C34 | C33 | C32 | 121.5(2)   |
| O2  | C9 | C1  | 112.14(16) | C35 | C34 | C33 | 120.2(2)   |
| O2  | C9 | C5  | 110.91(15) | C36 | C35 | C34 | 119.7(2)   |
| O2  | C9 | C8  | 105.53(15) | C35 | C36 | C37 | 120.2(2)   |
| C1  | C9 | C5  | 108.94(15) | C36 | C37 | C32 | 121.7(2)   |

**Table 6 Torsion Angles for 22.**

| A   | B  | C  | D  | Angle/°     | A  | B   | C   | D   | Angle/°  |
|-----|----|----|----|-------------|----|-----|-----|-----|----------|
| Si1 | O1 | C3 | C2 | 72.6(2)     | C8 | C7  | C12 | C11 | -10.8(2) |
| Si1 | O1 | C3 | C4 | -164.09(14) | C8 | C10 | C11 | C12 | 5.3(2)   |



---

|                 |             |                |             |
|-----------------|-------------|----------------|-------------|
| Si1 C26 C27 C28 | -174.70(17) | C8 C10 C11 C20 | -176.94(19) |
| Si1 C26 C31 C30 | 172.33(18)  | C9 C1 C2 C3    | -54.4(2)    |
| Si1 C32 C33 C34 | 179.56(17)  | C9 C5 C6 C7    | -38.79(17)  |
| Si1 C32 C37 C36 | 179.94(18)  | C9 C5 C6 C17   | -165.04(17) |
| O1 Si1 C22 C23  | 68.3(2)     | C9 C8 C10 C11  | 104.0(2)    |
| O1 Si1 C22 C24  | -171.73(18) | C10 C8 C9 O2   | -34.8(2)    |
| O1 Si1 C22 C25  | -49.8(2)    | C10 C8 C9 C1   | 90.7(2)     |
| O1 Si1 C26 C27  | -5.56(19)   | C10 C8 C9 C5   | -150.72(17) |
| O1 Si1 C26 C31  | -178.98(16) | C10 C11 C12 O4 | -178.9(2)   |
| O1 Si1 C32 C33  | -106.52(17) | C10 C11 C12 C7 | 3.6(2)      |
| O1 Si1 C32 C37  | 72.61(19)   | C12 C7 C8 C9   | -110.45(16) |
| O1 C3 C4 C5     | -172.38(15) | C12 C7 C8 C10  | 13.11(19)   |
| O1 C3 C4 C14    | 61.26(19)   | C13 C1 C2 C3   | 179.61(17)  |
| O3 C7 C8 C9     | 133.70(15)  | C13 C1 C9 O2   | 60.4(2)     |
| O3 C7 C8 C10    | -102.74(17) | C13 C1 C9 C5   | -176.41(17) |
| O3 C7 C12 O4    | -72.9(2)    | C13 C1 C9 C8   | -61.7(2)    |
| O3 C7 C12 C11   | 105.1(2)    | C14 C4 C5 C6   | -59.6(2)    |
| C1 C2 C3 O1     | 169.79(16)  | C14 C4 C5 C9   | -177.55(15) |
| C1 C2 C3 C4     | 50.6(2)     | C17 C6 C7 O3   | 25.6(2)     |
| C2 C1 C9 O2     | -63.63(19)  | C17 C6 C7 C8   | 145.68(18)  |
| C2 C1 C9 C5     | 59.53(19)   | C17 C6 C7 C12  | -99.7(2)    |
| C2 C1 C9 C8     | 174.26(16)  | C20 C11 C12 O4 | 3.8(4)      |

---

|              |             |                |             |
|--------------|-------------|----------------|-------------|
| C2 C3 C4 C5  | -50.6(2)    | C20C11C12 C7   | -173.7(2)   |
| C2 C3 C4 C14 | -176.98(16) | C21 O4 C12 C7  | 177.83(19)  |
| C3 C4 C5 C6  | 175.29(16)  | C21 O4 C12C11  | 0.4(4)      |
| C3 C4 C5 C9  | 57.38(19)   | C22 Si1 O1 C3  | 140.68(18)  |
| C3 C4 C14C15 | -126.1(2)   | C22 Si1 C26C27 | 108.33(18)  |
| C3 C4 C14C16 | 53.9(2)     | C22 Si1 C26C31 | -65.08(19)  |
| C4 C5 C6 C7  | -161.07(15) | C22 Si1 C32C33 | 134.70(17)  |
| C4 C5 C6 C17 | 72.7(2)     | C22 Si1 C32C37 | -46.2(2)    |
| C4 C5 C9 O2  | 60.7(2)     | C26 Si1 O1 C3  | -104.18(18) |
| C4 C5 C9 C1  | -63.22(19)  | C26 Si1 C22C23 | -48.2(2)    |
| C4 C5 C9 C8  | 172.57(15)  | C26 Si1 C22C24 | 71.8(2)     |
| C5 C4 C14C15 | 109.9(2)    | C26 Si1 C22C25 | -166.32(18) |
| C5 C4 C14C16 | -70.1(2)    | C26 Si1 C32C33 | 14.79(19)   |
| C5 C6 C7 O3  | -103.03(17) | C26 Si1 C32C37 | -166.09(17) |
| C5 C6 C7 C8  | 17.07(19)   | C26C27C28C29   | 2.1(3)      |
| C5 C6 C7 C12 | 131.66(18)  | C27C26C31C30   | -1.3(3)     |
| C5 C6 C17C18 | 49.7(3)     | C27C28C29C30   | -0.9(4)     |
| C5 C6 C17C19 | -132.7(2)   | C28C29C30C31   | -1.4(4)     |
| C6 C5 C9 O2  | -65.48(18)  | C29C30C31C26   | 2.5(4)      |
| C6 C5 C9 C1  | 170.63(15)  | C31C26C27C28   | -1.0(3)     |
| C6 C5 C9 C8  | 46.42(17)   | C32 Si1 O1 C3  | 17.3(2)     |
| C6 C7 C8 C9  | 11.15(19)   | C32 Si1 C22C23 | -169.5(2)   |

|               |             |                 |             |
|---------------|-------------|-----------------|-------------|
| C6 C7 C8 C10  | 134.72(16)  | C32 Si1 C22 C24 | -49.5(2)    |
| C6 C7 C12 O4  | 54.5(2)     | C32 Si1 C22 C25 | 72.5(2)     |
| C6 C7 C12 C11 | -127.48(19) | C32 Si1 C26 C27 | -128.19(17) |
| C7 C6 C17 C18 | -70.5(3)    | C32 Si1 C26 C31 | 58.39(19)   |
| C7 C6 C17 C19 | 107.1(2)    | C32 C33 C34 C35 | 0.3(3)      |
| C7 C8 C9 O2   | 80.99(17)   | C33 C32 C37 C36 | -0.9(3)     |
| C7 C8 C9 C1   | -153.53(16) | C33 C34 C35 C36 | -0.5(3)     |
| C7 C8 C9 C5   | -34.91(18)  | C34 C35 C36 C37 | 0.0(4)      |
| C7 C8 C10 C11 | -11.5(2)    | C35 C36 C37 C32 | 0.7(4)      |
| C8 C7 C12 O4  | 171.12(16)  | C37 C32 C33 C34 | 0.4(3)      |

**Table 7 Hydrogen Atom Coordinates ( $\text{\AA} \times 10^4$ ) and Isotropic Displacement Parameters ( $\text{\AA}^2 \times 10^3$ ) for 22.**

| Atom | <i>x</i>  | <i>y</i>  | <i>z</i>  | U(eq)  |
|------|-----------|-----------|-----------|--------|
| H2   | -6220(30) | -3930(30) | -4770(20) | 42(9)  |
| H3   | -2300(30) | -7190(40) | -5220(20) | 50(10) |
| H1   | -6757.87  | -7021.33  | -4353.17  | 22     |
| H2A  | -7440.72  | -4480.27  | -3873.44  | 21     |
| H2B  | -8026.67  | -5749.93  | -3486.31  | 21     |
| H3A  | -6155.95  | -6254.02  | -2691.62  | 19     |
| H4   | -4975.37  | -4070.55  | -3434.61  | 18     |
| H5   | -4577.39  | -6688.52  | -3895.07  | 17     |

*Supporting Information*

---

|      |          |          |          |    |
|------|----------|----------|----------|----|
| H6   | -3373.67 | -4489.77 | -4586.74 | 20 |
| H8   | -5218.55 | -7234.47 | -5552.49 | 21 |
| H10A | -5603.01 | -6546.73 | -6939.98 | 29 |
| H10B | -6174.11 | -5269.22 | -6536.17 | 29 |
| H13A | -8744.28 | -6396.17 | -5009.44 | 42 |
| H13B | -7753.99 | -6597.5  | -5750.37 | 42 |
| H13C | -8106.88 | -5189.29 | -5446.86 | 42 |
| H15A | -2558.14 | -4139.86 | -1796.91 | 38 |
| H15B | -3289.08 | -3298.11 | -2589.55 | 38 |
| H16A | -4503.52 | -6449.02 | -1659.45 | 41 |
| H16B | -3004.34 | -6269.35 | -1597.41 | 41 |
| H16C | -3683.55 | -7001.92 | -2422.81 | 41 |
| H18A | -1109.23 | -7173.41 | -3443.04 | 41 |
| H18B | -2557.14 | -7599.98 | -3764.26 | 41 |
| H19A | -1002.12 | -4459    | -4560.67 | 59 |
| H19B | -352.62  | -5131.34 | -3699.72 | 59 |
| H19C | -1424.24 | -4079.3  | -3599.96 | 59 |
| H20A | -3661.56 | -3966.41 | -7807.45 | 59 |
| H20B | -5151.53 | -3854.08 | -7722.41 | 59 |
| H20C | -4575.83 | -5087.8  | -8168.1  | 59 |
| H21A | -1749.2  | -4358.04 | -7352.49 | 58 |
| H21B | -863.19  | -3606.22 | -6634.77 | 58 |

*Supporting Information*

---

|      |           |          |          |    |
|------|-----------|----------|----------|----|
| H21C | -2283.11  | -3143.54 | -6859.09 | 58 |
| H23A | -5893.91  | -2309.14 | -1204.04 | 77 |
| H23B | -5943.03  | -1982.22 | -174.99  | 77 |
| H23C | -7203.63  | -1921.34 | -810.98  | 77 |
| H24A | -8224.44  | -3370.32 | 212.12   | 63 |
| H24B | -6959.78  | -3527.87 | 835.05   | 63 |
| H24C | -7658.77  | -4758.76 | 418.41   | 63 |
| H25A | -5525.55  | -5301.09 | -108.2   | 58 |
| H25B | -4938.55  | -3964.46 | 215.65   | 58 |
| H25C | -4887.49  | -4385.77 | -796.69  | 58 |
| H27  | -8135.57  | -2732.76 | -2992.05 | 28 |
| H28  | -9698.43  | -1236.67 | -3370.39 | 35 |
| H29  | -11323.34 | -869.57  | -2433.15 | 38 |
| H30  | -11412.08 | -2043.71 | -1130.31 | 35 |
| H31  | -9926.79  | -3638.83 | -798     | 30 |
| H33  | -9942.45  | -5800.97 | -1919.35 | 29 |
| H34  | -10769.61 | -7820.77 | -1693.9  | 35 |
| H35  | -9551.38  | -9370.89 | -938.78  | 35 |
| H36  | -7487.33  | -8901.9  | -424.08  | 35 |
| H37  | -6638.84  | -6898.12 | -663.54  | 31 |

## 5. NMR Spectrum

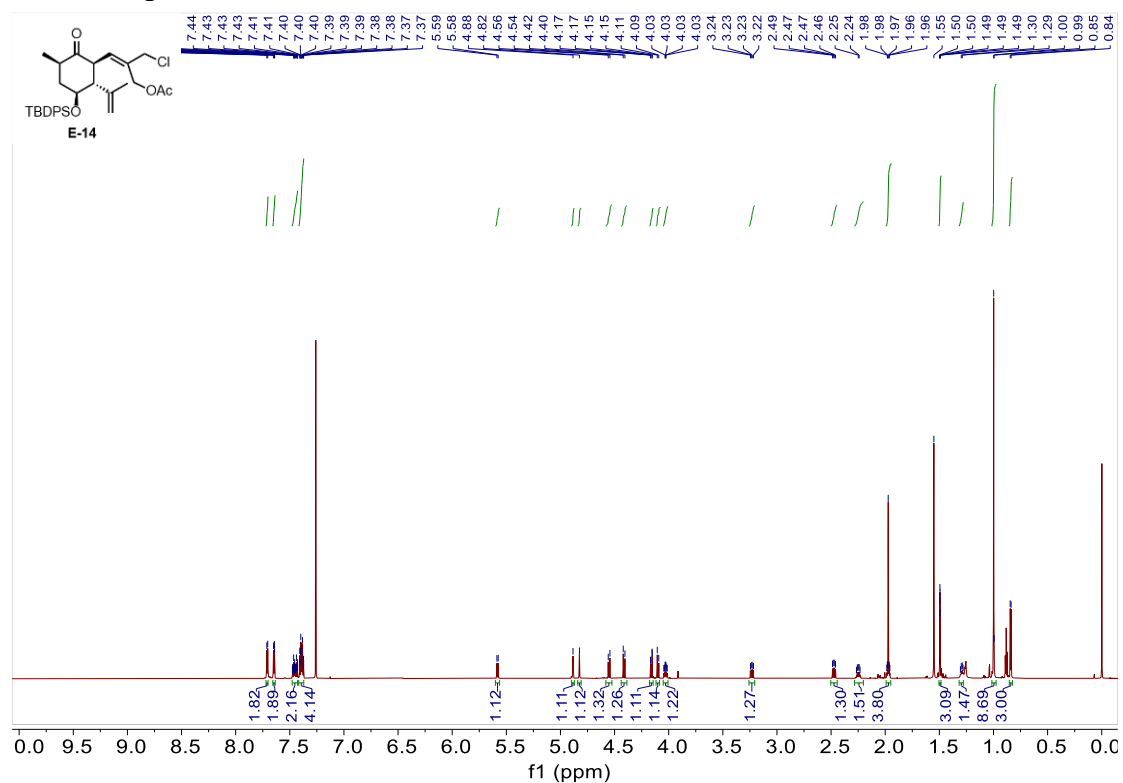<sup>1</sup>H NMR of compound (E)-14 (800 MHz)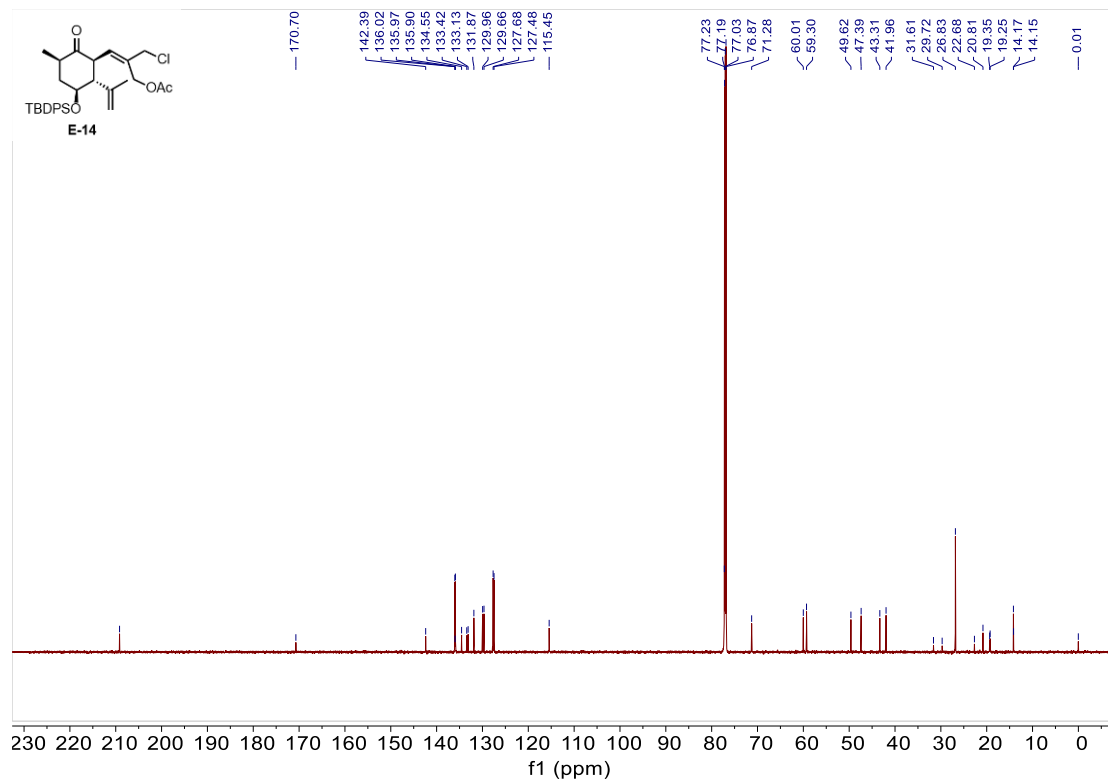<sup>13</sup>C NMR of compound (E)-14 (201 MHz)

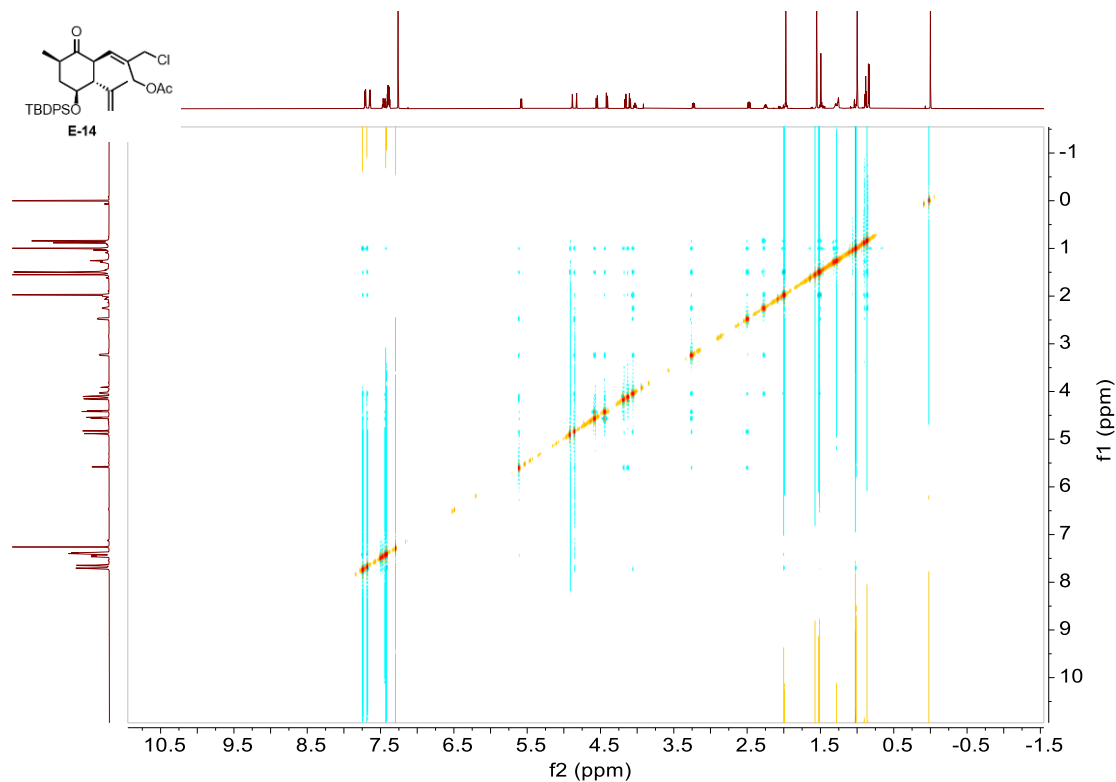NOESY of compound (*E*)-**14**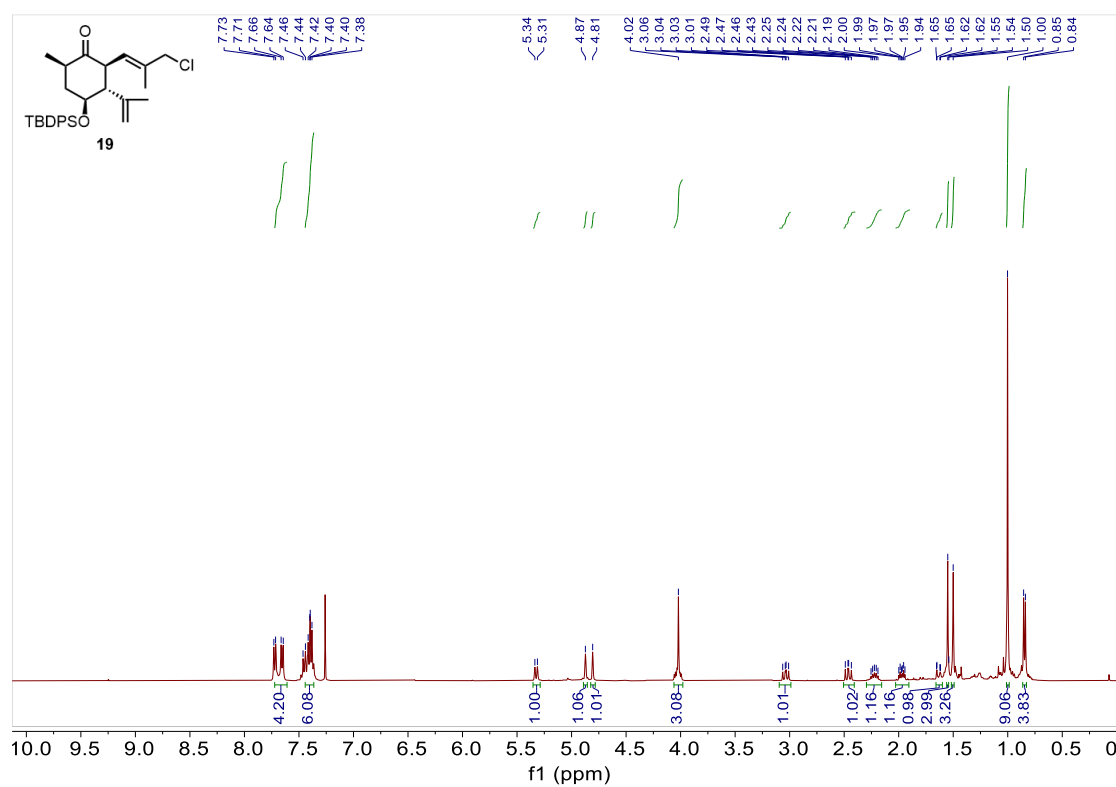 $^1\text{H}$  NMR of compound **19** (400 MHz)

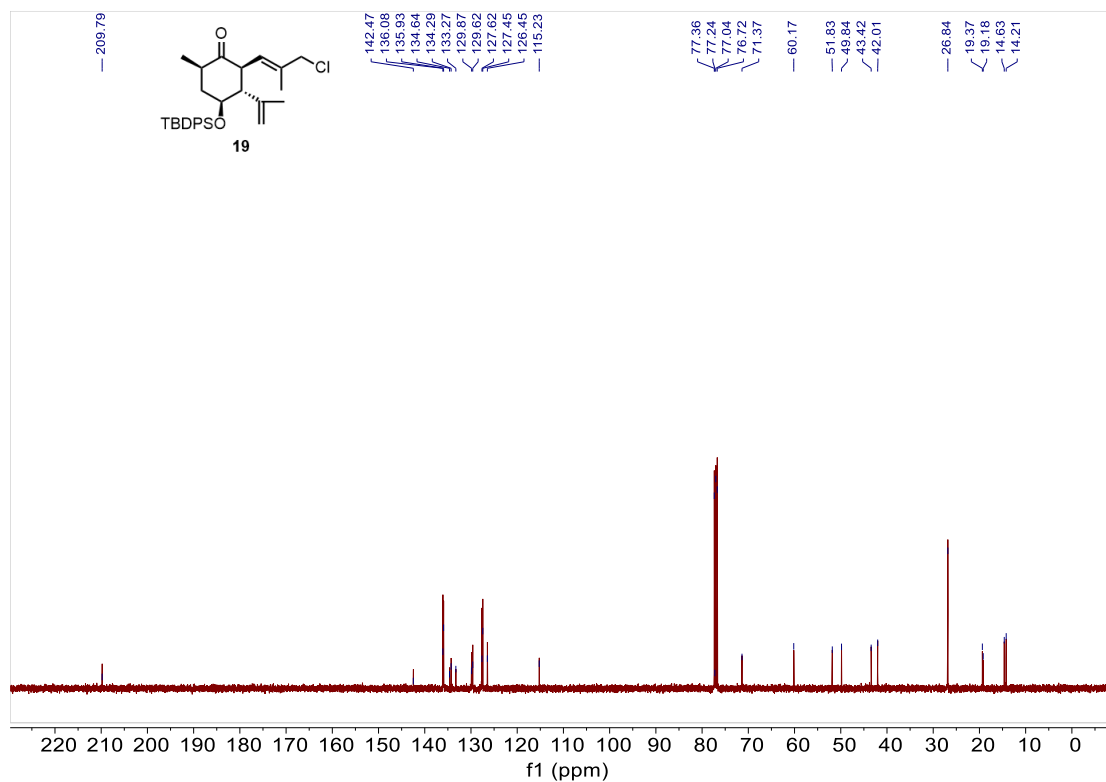<sup>13</sup>C NMR of compound **19** (101 MHz)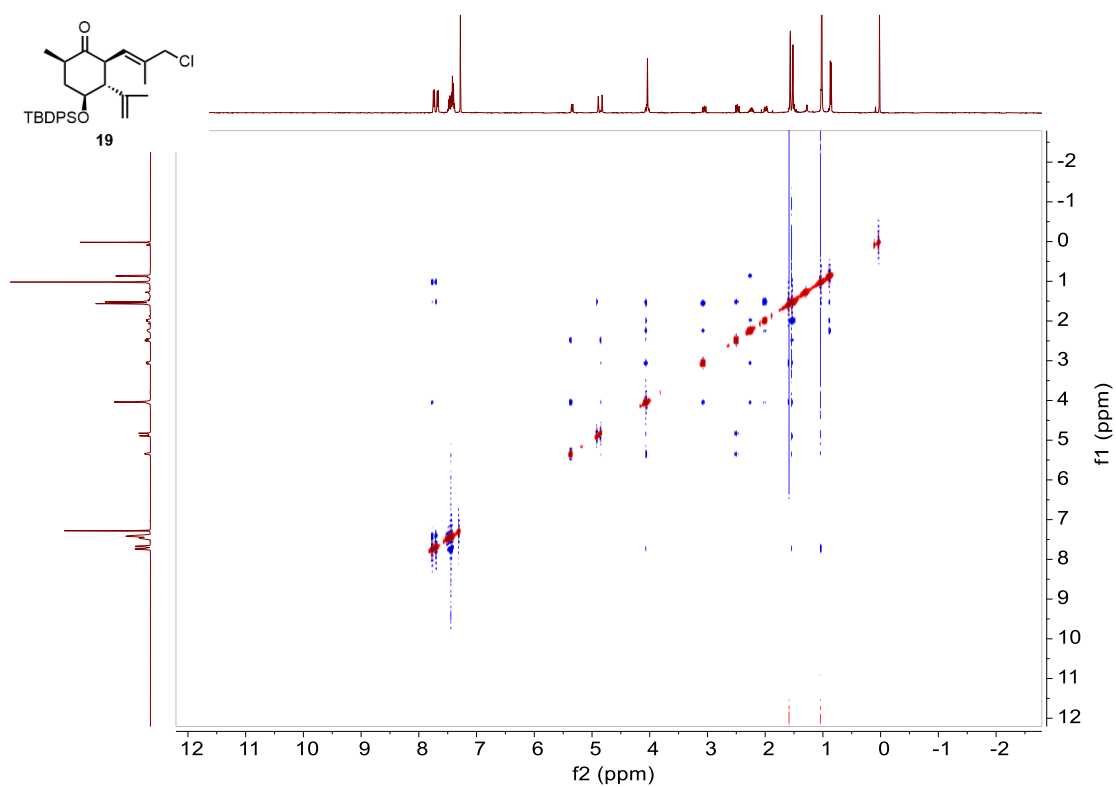NOESY of compound **19**



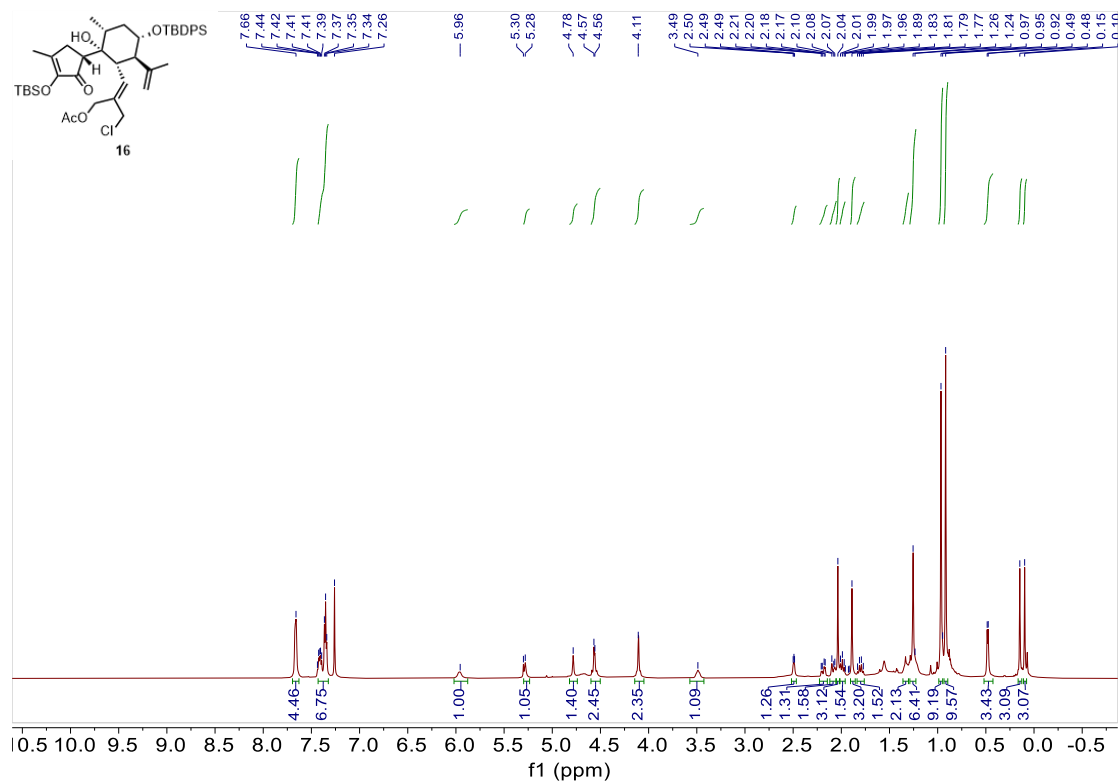**<sup>1</sup>H NMR of compound 16 (600 MHz)**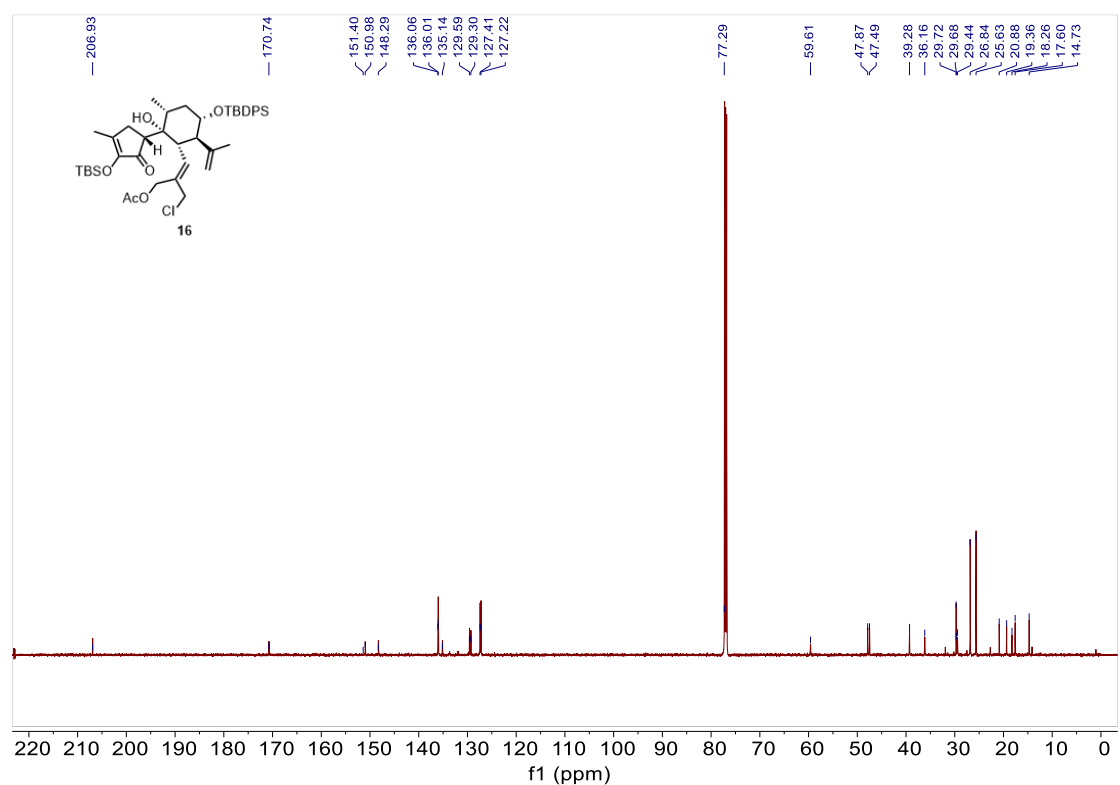**<sup>13</sup>C NMR of compound 16 (151 MHz)**

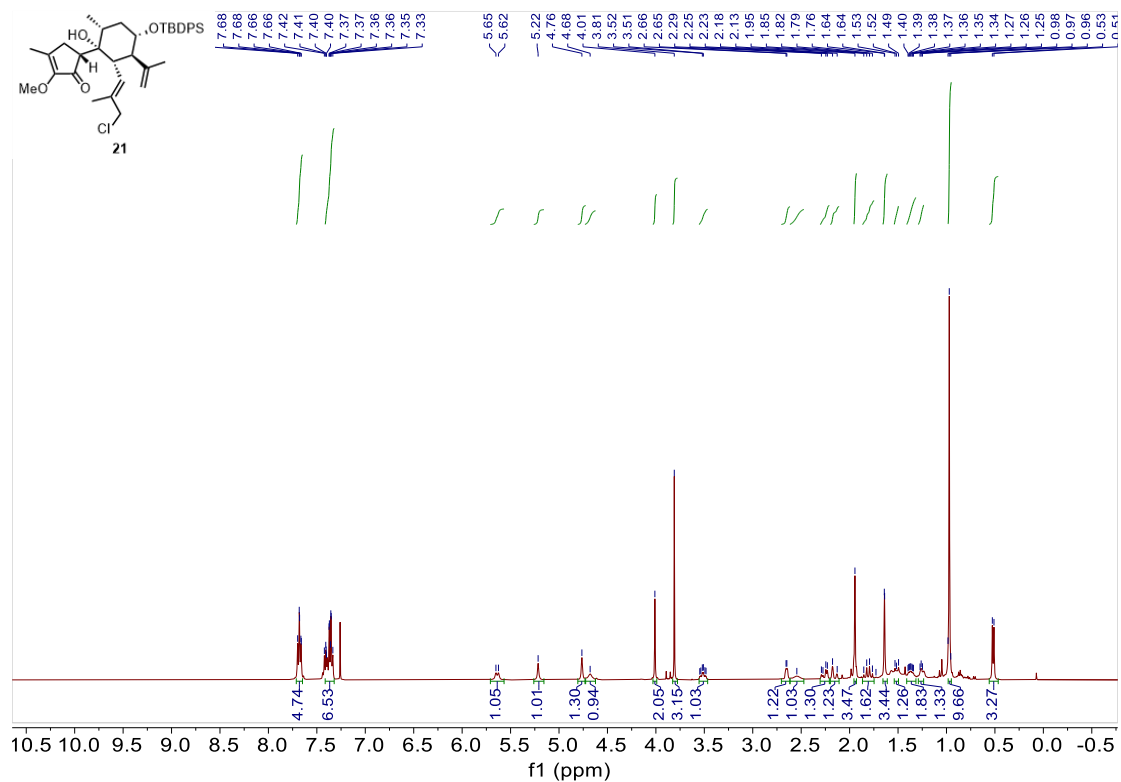

**<sup>1</sup>H NMR of compound 21 (400 MHz)**

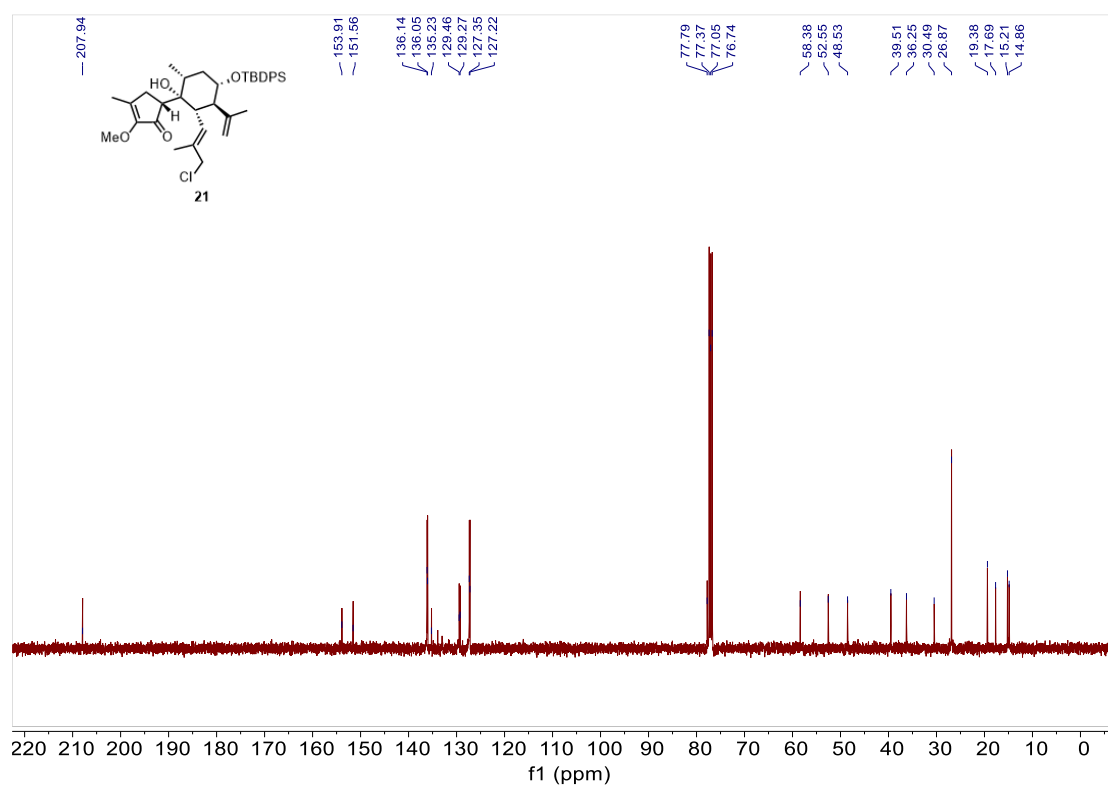

**<sup>13</sup>C NMR of compound 21 (101 MHz)**

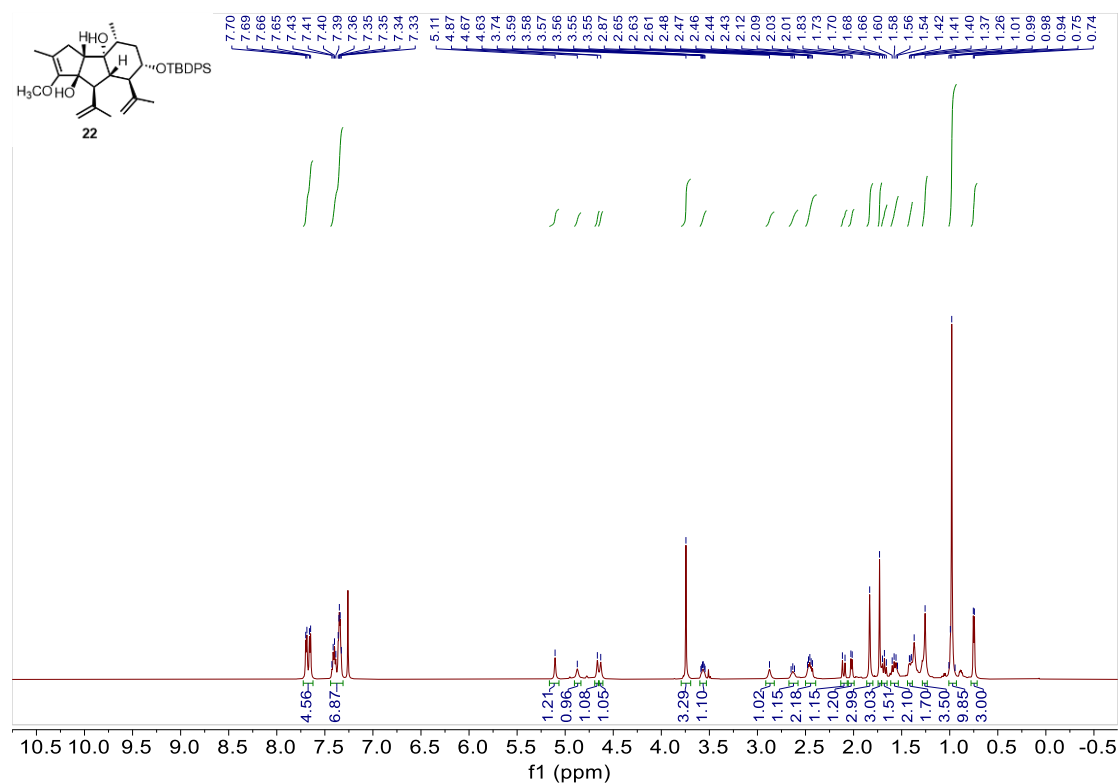

**<sup>1</sup>H NMR of compound 22 (600 MHz)**

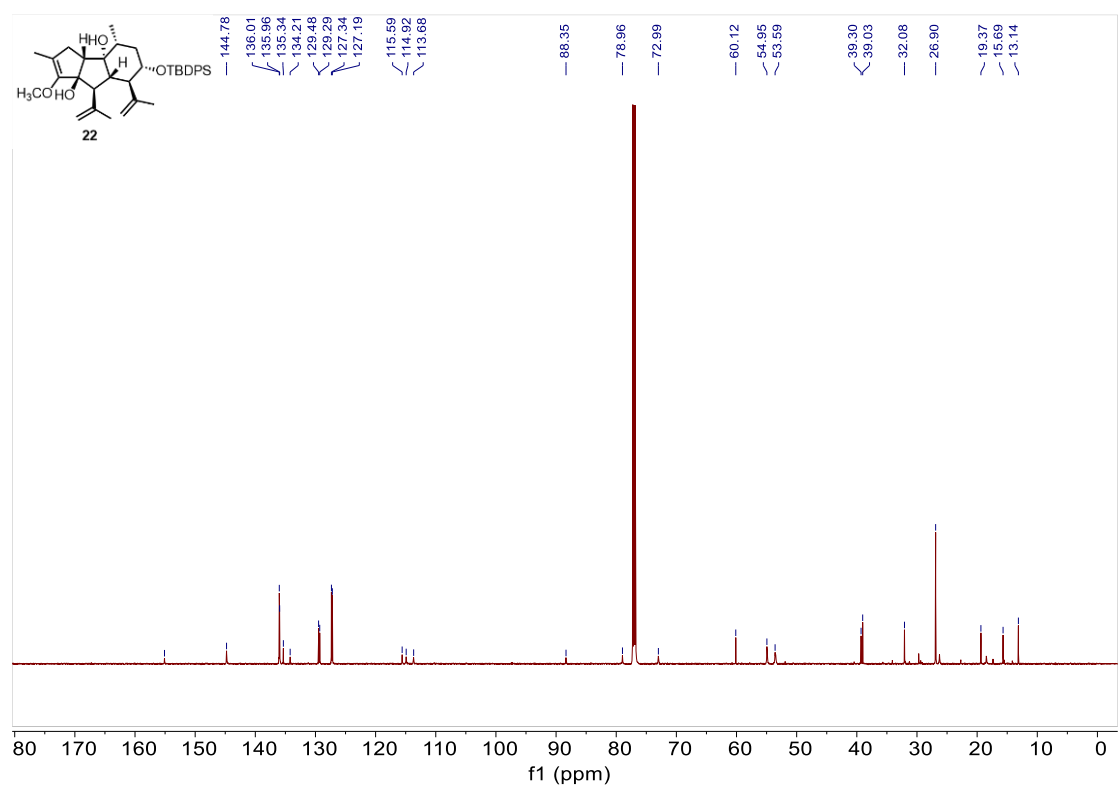

**<sup>13</sup>C NMR of compound 22 (151 MHz)**

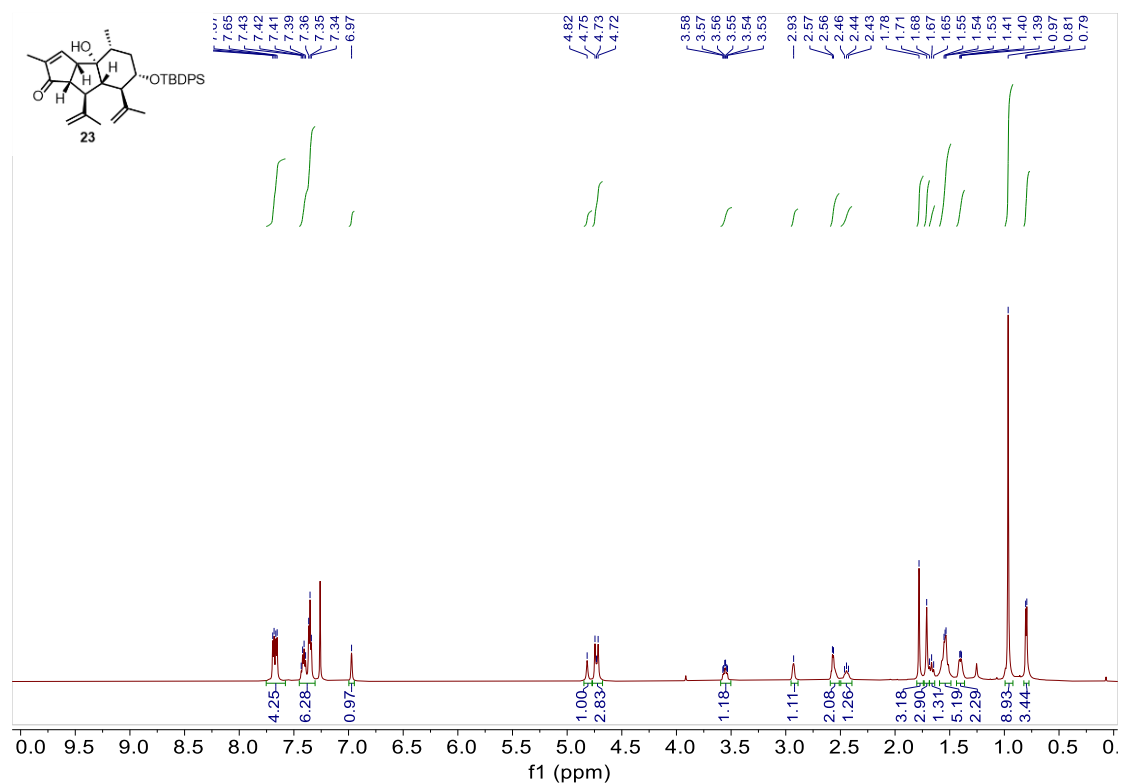

**<sup>1</sup>H NMR of compound 23 (600 MHz)**

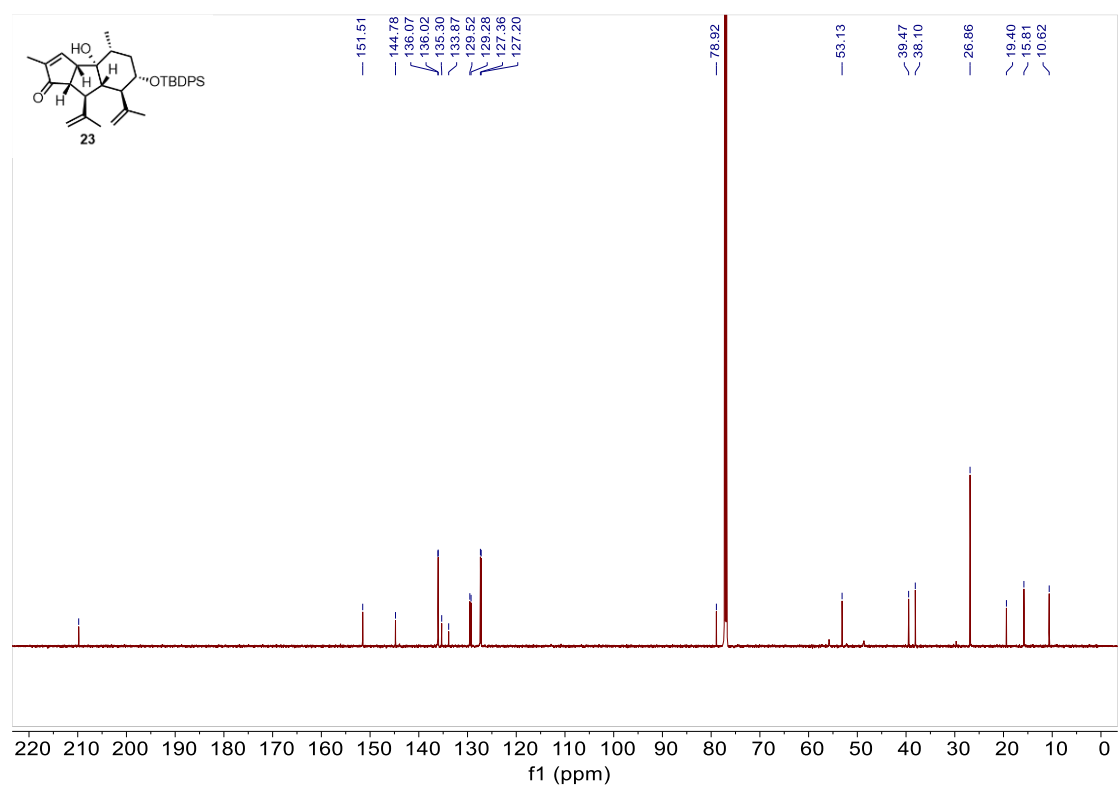

**<sup>13</sup>C NMR of compound 23 (151 MHz)**

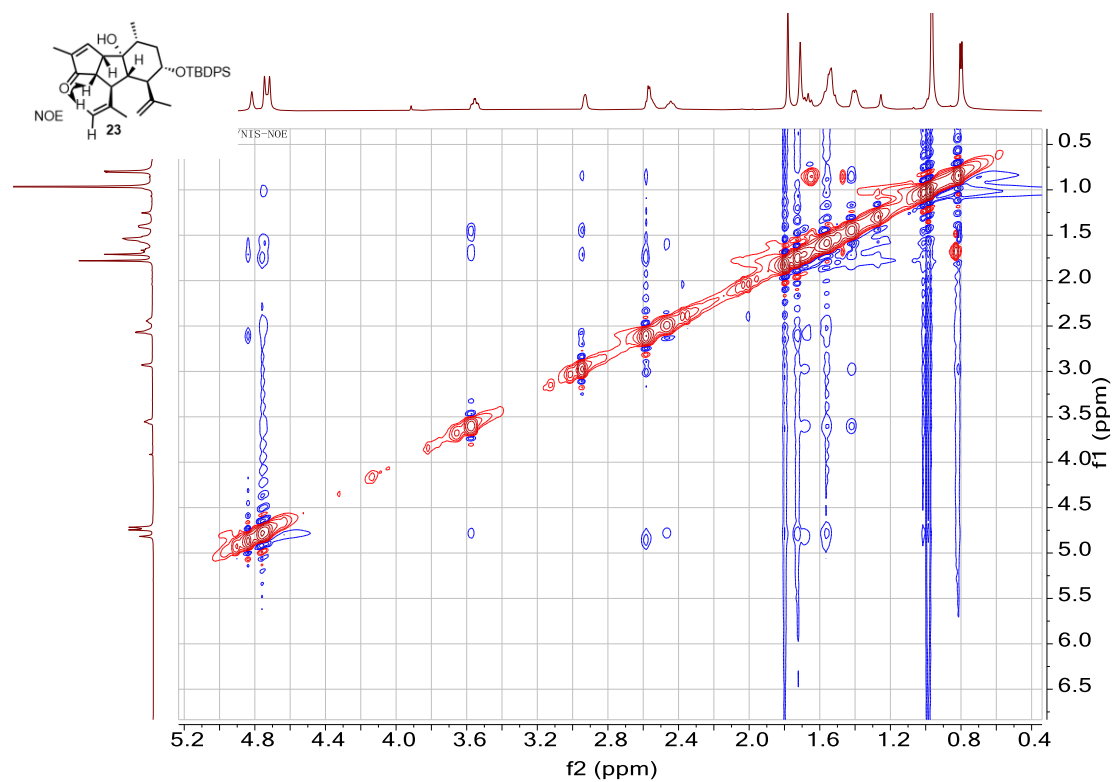NOESY of compound **23**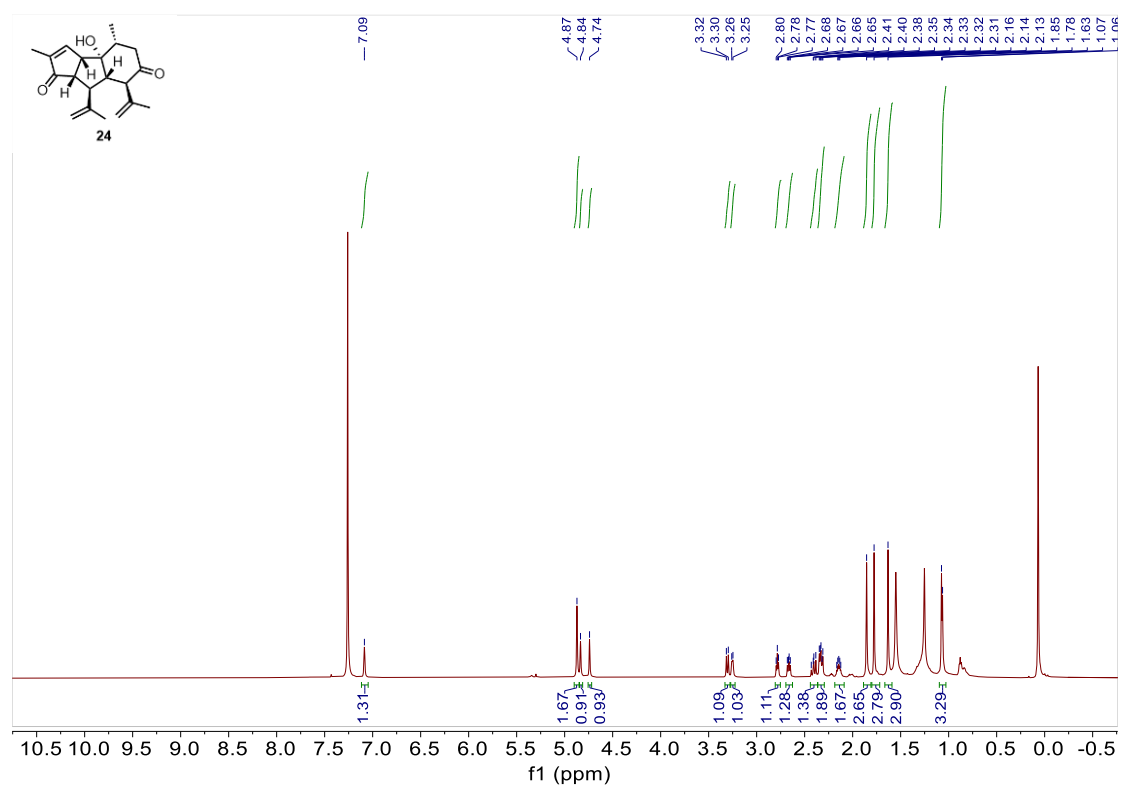<sup>1</sup>H NMR of compound **24** (600 MHz)

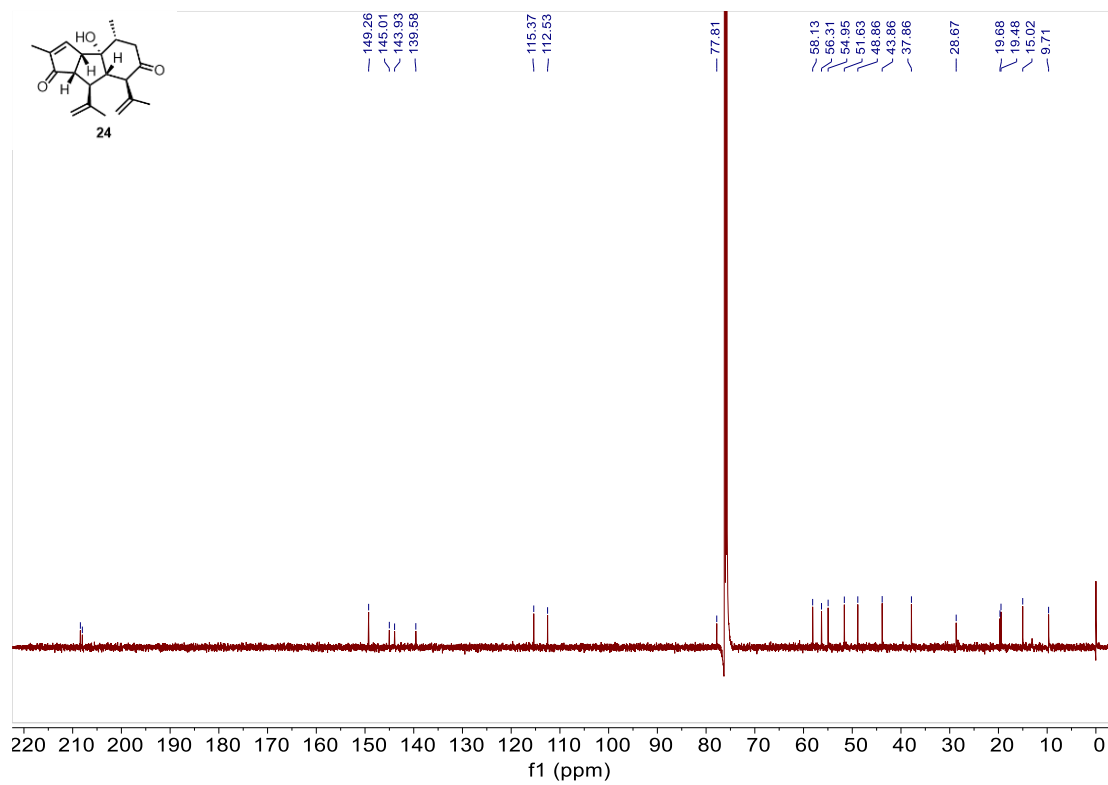 $^{13}\text{C}$  NMR of compound **24** (151 MHz)

## 6. Reference

- (1) A. L. García-Cabeza, R. Marín-Barrios, R. Azarken, F. J. MorenoDorado, M. J. Ortega, H. Vidal, J. M. M. Gatica, G. M. Massanet, F. M. Guerra, *Eur. J. Org. Chem.*, 2013, **2013**, 8307-8314.
- (2) T. Yu, Y. Sun, C. Tu, T. Chen, S. Fu, B. Liu, *Chem. Sci.*, 2020, **11**, 7177-7181.
